# Supplementary material for: Neural Modelling in the Exploration of the Biomethane Potential from Cattle Manure: A Case Study on Herds Structure from Wielkopolskie, Podlaskie, and Mazowieckie Voivodeships in Poland
Source: MDPI journal article supplement (doi:10.3390/s23010164), 2022-12-23
Supplement: s1 [file s1]

| Mazowieckie Voivodeship |                    |        |                         |                          |                        |                           |                  |               |                          |                                       |                                                            |                                                            |
|-------------------------|--------------------|--------|-------------------------|--------------------------|------------------------|---------------------------|------------------|---------------|--------------------------|---------------------------------------|------------------------------------------------------------|------------------------------------------------------------|
| Community               | District           | Calves | Bulls<br>6-12<br>months | Bulls<br>12-24<br>months | Bulls<br>>24<br>months | Heifers<br>6-12<br>months | Heifers<br>12-18 | Dairy<br>cows | Manure<br>mass<br>(tons) | Slurry<br>volume<br>(m <sup>3</sup> ) | Amount<br>of biogas<br>from<br>manure<br>(m <sup>3</sup> ) | Amount<br>of biogas<br>from<br>slurry<br>(m <sup>3</sup> ) |
| białobrzeski            | Białobrzegi        | 71     | 68                      | 73                       | 22                     | 27                        | 23               | 234           | 4866                     | 1127                                  | 291959                                                     | 31557                                                      |
| białobrzeski            | Promna             | 75     | 84                      | 110                      | 152                    | 24                        | 30               | 298           | 8517                     | 1973                                  | 511034                                                     | 55235                                                      |
| białobrzeski            | Radzanów           | 187    | 238                     | 273                      | 73                     | 55                        | 42               | 519           | 12641                    | 2928                                  | 758480                                                     | 81981                                                      |
| białobrzeski            | Stara Błotnica     | 615    | 510                     | 809                      | 140                    | 237                       | 165              | 1641          | 37478                    | 8680                                  | 2248679                                                    | 243050                                                     |
| białobrzeski            | Stromiec           | 267    | 281                     | 284                      | 112                    | 98                        | 103              | 1015          | 20897                    | 4840                                  | 1253833                                                    | 135521                                                     |
| białobrzeski            | Wyśmierzyce        | 141    | 95                      | 149                      | 124                    | 51                        | 31               | 416           | 10205                    | 2364                                  | 612328                                                     | 66184                                                      |
| ciechanowski            | Ciechanów          | 998    | 541                     | 897                      | 144                    | 561                       | 457              | 3186          | 63275                    | 14655                                 | 3796503                                                    | 410347                                                     |
| ciechanowski            | Głinojeck          | 389    | 221                     | 460                      | 72                     | 212                       | 177              | 1291          | 26706                    | 6185                                  | 1602344                                                    | 173190                                                     |
| ciechanowski            | Gołymín-Ośródek    | 871    | 470                     | 879                      | 169                    | 508                       | 497              | 2905          | 59637                    | 13813                                 | 3578234                                                    | 386755                                                     |
| ciechanowski            | Grudusk            | 799    | 372                     | 616                      | 138                    | 495                       | 427              | 3092          | 57504                    | 13319                                 | 3450255                                                    | 372923                                                     |
| ciechanowski            | Ojrzeń             | 816    | 425                     | 576                      | 120                    | 451                       | 436              | 2876          | 54172                    | 12547                                 | 3250312                                                    | 351312                                                     |
| ciechanowski            | Opinogóra Górna    | 1585   | 670                     | 1301                     | 225                    | 847                       | 880              | 5942          | 111118                   | 25736                                 | 6667058                                                    | 720613                                                     |
| ciechanowski            | Regimin            | 660    | 282                     | 444                      | 82                     | 356                       | 341              | 2325          | 42918                    | 9940                                  | 2575068                                                    | 278328                                                     |
| ciechanowski            | Sońsk              | 1433   | 1016                    | 1668                     | 250                    | 750                       | 738              | 4700          | 98656                    | 22850                                 | 5919351                                                    | 639796                                                     |
| garwoliński             | Borowie            | 520    | 193                     | 356                      | 66                     | 307                       | 280              | 2158          | 38176                    | 8842                                  | 2290585                                                    | 247579                                                     |
| garwoliński             | Garwolin           | 213    | 98                      | 159                      | 108                    | 120                       | 122              | 818           | 16503                    | 3822                                  | 990207                                                     | 107027                                                     |
| garwoliński             | Górzno             | 394    | 146                     | 230                      | 74                     | 232                       | 231              | 1506          | 27489                    | 6367                                  | 1649310                                                    | 178267                                                     |
| garwoliński             | Łaskarzew          | 410    | 184                     | 270                      | 85                     | 211                       | 198              | 1536          | 28236                    | 6540                                  | 1694168                                                    | 183115                                                     |
| garwoliński             | Maciejowice        | 765    | 438                     | 699                      | 183                    | 429                       | 307              | 2499          | 50287                    | 11647                                 | 3017243                                                    | 326120                                                     |
| garwoliński             | Miastków Kościelny | 567    | 227                     | 300                      | 132                    | 299                       | 331              | 2185          | 39841                    | 9228                                  | 2390461                                                    | 258374                                                     |
| garwoliński             | Parysów            | 264    | 126                     | 170                      | 47                     | 159                       | 146              | 1076          | 19422                    | 4498                                  | 1165306                                                    | 125953                                                     |

|             |                        |      |     |     |     |     |     |      |       |       |         |        |
|-------------|------------------------|------|-----|-----|-----|-----|-----|------|-------|-------|---------|--------|
| garwoliński | Pilawa                 | 121  | 73  | 107 | 31  | 55  | 41  | 319  | 6867  | 1591  | 412040  | 44536  |
| garwoliński | Sobolew                | 579  | 421 | 506 | 128 | 282 | 237 | 1699 | 35405 | 8200  | 2124304 | 229607 |
| garwoliński | Trojanów               | 1279 | 679 | 989 | 277 | 643 | 587 | 4730 | 89039 | 20622 | 5342334 | 577429 |
| garwoliński | Wilga                  | 76   | 16  | 30  | 10  | 26  | 47  | 320  | 5362  | 1242  | 321749  | 34776  |
| garwoliński | Żelechów               | 627  | 344 | 493 | 133 | 303 | 325 | 2328 | 44177 | 10232 | 2650636 | 286495 |
| gostyniński | Gostynin               | 530  | 276 | 464 | 120 | 264 | 281 | 1535 | 32468 | 7520  | 1948055 | 210557 |
| gostyniński | Pacyna                 | 737  | 442 | 889 | 128 | 282 | 296 | 2284 | 47784 | 11067 | 2867027 | 309884 |
| gostyniński | Sanniki                | 425  | 257 | 454 | 142 | 191 | 164 | 1247 | 27328 | 6330  | 1639687 | 177226 |
| gostyniński | Szczawin Kościelny     | 566  | 299 | 512 | 89  | 239 | 226 | 1432 | 30586 | 7084  | 1835182 | 198357 |
| grodziski   | Baranów                | 258  | 128 | 196 | 108 | 161 | 135 | 1499 | 26076 | 6040  | 1564579 | 169108 |
| grodziski   | Grodzisk Mazowiecki    | 26   | 22  | 21  | 43  | 40  | 24  | 287  | 5185  | 1201  | 311091  | 33624  |
| grodziski   | Jaktorów               | 56   | 31  | 56  | 50  | 29  | 42  | 330  | 6451  | 1494  | 387081  | 41838  |
| grodziski   | Milanówek              | 5    | 0   | 1   | 2   | 2   | 1   | 14   | 252   | 58    | 15144   | 1637   |
| grodziski   | Żabia Wola             | 37   | 29  | 30  | 66  | 29  | 15  | 250  | 5129  | 1188  | 307755  | 33264  |
| grójecki    | Belsk Duży             | 0    | 0   | 0   | 3   | 0   | 0   | 13   | 220   | 51    | 13189   | 1426   |
| grójecki    | Błędów                 | 21   | 11  | 17  | 8   | 9   | 9   | 141  | 2328  | 539   | 139673  | 15097  |
| grójecki    | Chynów                 | 58   | 78  | 176 | 76  | 16  | 17  | 236  | 6821  | 1580  | 409241  | 44233  |
| grójecki    | Goszczyn               | 5    | 1   | 2   | 14  | 2   | 1   | 49   | 928   | 215   | 55708   | 6021   |
| grójecki    | Grójec                 | 17   | 52  | 29  | 26  | 8   | 8   | 110  | 2512  | 582   | 150715  | 16290  |
| grójecki    | Jasieniec              | 19   | 16  | 27  | 14  | 12  | 5   | 158  | 2741  | 635   | 164440  | 17774  |
| grójecki    | Mogielnica             | 52   | 70  | 75  | 39  | 26  | 10  | 245  | 5166  | 1196  | 309941  | 33500  |
| grójecki    | Nowe Miasto nad Pilicą | 293  | 166 | 275 | 93  | 88  | 82  | 909  | 18466 | 4277  | 1107988 | 119757 |
| grójecki    | Pniewy                 | 22   | 11  | 8   | 42  | 9   | 13  | 114  | 2542  | 589   | 152517  | 16485  |
| grójecki    | Warka                  | 10   | 4   | 4   | 14  | 12  | 2   | 125  | 1990  | 461   | 119391  | 12904  |
| kozienicki  | Garbatka-Letnisko      | 39   | 29  | 41  | 11  | 49  | 34  | 250  | 4532  | 1050  | 271946  | 29393  |
| kozienicki  | Głowaczów              | 337  | 289 | 359 | 179 | 148 | 121 | 1153 | 25167 | 5829  | 1510021 | 163211 |
| kozienicki  | Gniewoszków            | 281  | 300 | 516 | 105 | 200 | 139 | 887  | 22367 | 5180  | 1342015 | 145052 |
| kozienicki  | Grabów nad Pilicą      | 237  | 174 | 208 | 95  | 161 | 111 | 1135 | 21205 | 4911  | 1272313 | 137519 |
| kozienicki  | Kozienice              | 89   | 131 | 110 | 48  | 63  | 29  | 377  | 8012  | 1856  | 480745  | 51962  |

|             |                  |      |      |      |     |      |      |      |        |       |         |        |
|-------------|------------------|------|------|------|-----|------|------|------|--------|-------|---------|--------|
| kozienicki  | Magnuszew        | 313  | 210  | 299  | 104 | 124  | 93   | 661  | 16197  | 3751  | 971804  | 105038 |
| kozienicki  | Sieciechów       | 138  | 100  | 157  | 44  | 50   | 56   | 366  | 8482   | 1965  | 508925  | 55007  |
| legionowski | Jabłonna         | 0    | 0    | 0    | 2   | 0    | 1    | 1    | 59     | 14    | 3527    | 381    |
| legionowski | Legionowo        | 0    | 0    | 0    | 0   | 0    | 0    | 1    | 13     | 3     | 767     | 83     |
| legionowski | Nieporęt         | 99   | 42   | 111  | 46  | 20   | 13   | 203  | 5113   | 1184  | 306758  | 33156  |
| legionowski | Serock           | 125  | 90   | 167  | 42  | 38   | 52   | 334  | 7989   | 1850  | 479365  | 51812  |
| legionowski | Wieliszew        | 33   | 34   | 51   | 26  | 14   | 9    | 109  | 2719   | 630   | 163137  | 17633  |
| lipski      | Chotcza          | 129  | 96   | 94   | 62  | 67   | 46   | 598  | 11055  | 2561  | 663320  | 71695  |
| lipski      | Ciepielów        | 609  | 322  | 535  | 177 | 357  | 333  | 2578 | 48759  | 11293 | 2925534 | 316208 |
| lipski      | Lipsko           | 73   | 45   | 56   | 69  | 41   | 25   | 457  | 8373   | 1939  | 502369  | 54299  |
| lipski      | Rzecznów         | 134  | 136  | 185  | 132 | 77   | 52   | 678  | 14523  | 3364  | 871392  | 94185  |
| lipski      | Sienno           | 135  | 167  | 208  | 98  | 118  | 104  | 678  | 14960  | 3465  | 897578  | 97015  |
| lipski      | Solec nad Wisłą  | 97   | 43   | 100  | 128 | 62   | 40   | 645  | 12553  | 2907  | 753189  | 81409  |
| łosicki     | Huszelw          | 831  | 673  | 1149 | 163 | 222  | 209  | 905  | 33391  | 7734  | 2003457 | 216545 |
| łosicki     | Łosice           | 570  | 484  | 749  | 79  | 237  | 194  | 1165 | 29800  | 6902  | 1788024 | 193260 |
| łosicki     | Olszanka         | 1176 | 726  | 1012 | 59  | 498  | 540  | 3407 | 67412  | 15613 | 4044717 | 437175 |
| łosicki     | Platerów         | 472  | 378  | 664  | 78  | 200  | 154  | 737  | 22299  | 5165  | 1337913 | 144609 |
| łosicki     | Sarnaki          | 434  | 285  | 518  | 66  | 178  | 183  | 1036 | 24195  | 5604  | 1451706 | 156908 |
| łosicki     | Stara Kornica    | 1078 | 887  | 1522 | 163 | 341  | 292  | 1703 | 50002  | 11581 | 3000105 | 324268 |
| makowski    | Czerwonka        | 650  | 502  | 806  | 140 | 346  | 287  | 1902 | 42485  | 9840  | 2549073 | 275518 |
| makowski    | Karniewo         | 2008 | 1022 | 1470 | 260 | 1021 | 955  | 5945 | 117104 | 27123 | 7026265 | 759438 |
| makowski    | Krasnosielc      | 1398 | 499  | 706  | 156 | 1146 | 1103 | 7953 | 131913 | 30553 | 7914756 | 855471 |
| makowski    | Maków Mazowiecki | 15   | 22   | 64   | 2   | 20   | 13   | 70   | 1907   | 442   | 114445  | 12370  |
| makowski    | Młynarze         | 435  | 309  | 399  | 59  | 289  | 226  | 1786 | 33397  | 7735  | 2003840 | 216586 |
| makowski    | Płoniawy-Bramura | 1322 | 711  | 980  | 161 | 887  | 758  | 5299 | 97032  | 22474 | 5821929 | 629266 |
| makowski    | Różan            | 298  | 203  | 343  | 110 | 146  | 109  | 907  | 20090  | 4653  | 1205410 | 130287 |
| makowski    | Rzewnie          | 631  | 342  | 560  | 162 | 401  | 297  | 2527 | 48014  | 11121 | 2880829 | 311376 |
| makowski    | Sypniewo         | 1335 | 612  | 954  | 182 | 932  | 804  | 6403 | 111539 | 25834 | 6692362 | 723348 |
| makowski    | Szelków          | 893  | 443  | 871  | 165 | 375  | 378  | 2446 | 51830  | 12004 | 3109796 | 336124 |

|             |                      |      |     |      |     |      |     |       |        |       |         |         |
|-------------|----------------------|------|-----|------|-----|------|-----|-------|--------|-------|---------|---------|
| miński      | Cegłów               | 223  | 121 | 178  | 87  | 109  | 121 | 920   | 17680  | 4095  | 1060829 | 114660  |
| miński      | Dębe Wielkie         | 99   | 73  | 88   | 148 | 47   | 57  | 516   | 11375  | 2635  | 682490  | 73767   |
| miński      | Dobre                | 327  | 172 | 237  | 174 | 173  | 163 | 1313  | 25933  | 6006  | 1555952 | 168176  |
| miński      | Halinów              | 50   | 17  | 43   | 78  | 27   | 19  | 250   | 5489   | 1271  | 329341  | 35597   |
| miński      | Jakubów              | 322  | 179 | 426  | 249 | 169  | 201 | 1437  | 31182  | 7222  | 1870915 | 202219  |
| miński      | Kałużyn              | 274  | 151 | 293  | 125 | 144  | 130 | 1141  | 22800  | 5281  | 1367971 | 147858  |
| miński      | Latowicz             | 1159 | 435 | 696  | 277 | 673  | 735 | 5539  | 96845  | 22430 | 5810695 | 628052  |
| miński      | Mińsk Mazowiecki     | 261  | 90  | 149  | 145 | 156  | 125 | 1159  | 21651  | 5015  | 1299074 | 140411  |
| miński      | Mrozy                | 398  | 116 | 224  | 131 | 257  | 196 | 1764  | 31375  | 7267  | 1882494 | 203470  |
| miński      | Siennica             | 722  | 295 | 356  | 194 | 401  | 432 | 3165  | 56029  | 12977 | 3361728 | 363354  |
| miński      | Stanisławów          | 208  | 164 | 231  | 188 | 136  | 104 | 826   | 18894  | 4376  | 1133637 | 122530  |
| miński      | Sulejówek            | 2    | 0   | 1    | 2   | 0    | 0   | 7     | 139    | 32    | 8358    | 903     |
| mławski     | Dzierzgowo           | 1101 | 530 | 656  | 271 | 832  | 705 | 6105  | 104118 | 24115 | 6247081 | 675219  |
| mławski     | Lipowiec Kościelny   | 625  | 213 | 361  | 99  | 397  | 344 | 2883  | 49361  | 11433 | 2961650 | 320112  |
| mławski     | Mława                | 42   | 33  | 27   | 36  | 31   | 5   | 89    | 2435   | 564   | 146075  | 15789   |
| mławski     | Radzanów             | 850  | 277 | 434  | 224 | 653  | 610 | 5832  | 94410  | 21866 | 5664582 | 612259  |
| mławski     | Strzegowo            | 1469 | 669 | 1010 | 456 | 980  | 812 | 7147  | 127264 | 29476 | 7635833 | 825323  |
| mławski     | Stupsk               | 842  | 318 | 556  | 209 | 508  | 519 | 4351  | 75117  | 17398 | 4507020 | 487144  |
| mławski     | Szreńsk              | 891  | 329 | 390  | 268 | 735  | 588 | 5510  | 90999  | 21077 | 5459961 | 590143  |
| mławski     | Szydłowo             | 749  | 312 | 514  | 264 | 509  | 408 | 3894  | 68499  | 15865 | 4109933 | 444224  |
| mławski     | Wieczfnia Kościelna  | 842  | 477 | 683  | 294 | 667  | 493 | 5156  | 89178  | 20655 | 5350654 | 578328  |
| mławski     | Wiśniewo             | 579  | 206 | 268  | 143 | 416  | 341 | 2813  | 48230  | 11171 | 2893788 | 312777  |
| nowodworski | Czosnów              | 20   | 38  | 35   | 22  | 32   | 11  | 187   | 3561   | 825   | 213630  | 23090   |
| nowodworski | Leoncin              | 34   | 21  | 26   | 15  | 33   | 11  | 151   | 2849   | 660   | 170920  | 18474   |
| nowodworski | Nasielsk             | 827  | 639 | 1042 | 203 | 436  | 328 | 2307  | 52829  | 12236 | 3169760 | 342605  |
| nowodworski | Nowy Dwór Mazowiecki | 0    | 0   | 0    | 0   | 0    | 0   | 0     | 0      | 0     | 0       | 0       |
| nowodworski | Pomieczówek          | 116  | 121 | 192  | 49  | 62   | 36  | 212   | 6841   | 1584  | 410468  | 44366   |
| nowodworski | Zakroczym            | 14   | 19  | 37   | 18  | 10   | 4   | 72    | 1799   | 417   | 107965  | 11670   |
| ostrołęcki  | Baranowo             | 1074 | 283 | 323  | 386 | 1227 | 791 | 10351 | 158430 | 36694 | 9505790 | 1027438 |

|            |                   |      |     |      |     |      |      |       |        |       |          |         |
|------------|-------------------|------|-----|------|-----|------|------|-------|--------|-------|----------|---------|
| ostrołęcki | Czarnia           | 428  | 189 | 194  | 125 | 607  | 260  | 4469  | 67864  | 15718 | 4071861  | 440109  |
| ostrołęcki | Czerwin           | 2099 | 703 | 1065 | 592 | 1798 | 1518 | 14700 | 238479 | 55235 | 14308756 | 1546570 |
| ostrołęcki | Goworowo          | 1530 | 785 | 1207 | 448 | 965  | 760  | 7044  | 127791 | 29598 | 7667463  | 828742  |
| ostrołęcki | Kadzidło          | 1298 | 343 | 394  | 321 | 1593 | 898  | 12640 | 190403 | 44100 | 11424170 | 1234788 |
| ostrołęcki | Lelis             | 709  | 219 | 325  | 276 | 924  | 540  | 6240  | 99271  | 22992 | 5956234  | 643783  |
| ostrołęcki | Łyse              | 1463 | 354 | 408  | 400 | 1976 | 991  | 15286 | 228553 | 52936 | 13713183 | 1482197 |
| ostrołęcki | Myszyniec         | 1098 | 458 | 548  | 428 | 1722 | 824  | 13702 | 207260 | 48004 | 12435579 | 1344106 |
| ostrołęcki | Olszewo-Borki     | 621  | 244 | 308  | 208 | 584  | 369  | 4319  | 70205  | 16260 | 4212301  | 455289  |
| ostrołęcki | Rzekuń            | 714  | 322 | 534  | 226 | 466  | 468  | 3726  | 66296  | 15355 | 3977775  | 429940  |
| ostrołęcki | Troszyn           | 1693 | 449 | 667  | 380 | 1217 | 1187 | 10125 | 164785 | 38166 | 9887081  | 1068651 |
| Ostrołęka  | Ostrołęka         | 6    | 2   | 12   | 8   | 6    | 4    | 62    | 1141   | 264   | 68475    | 7401    |
| ostrowski  | Andrzejewo        | 2260 | 756 | 1345 | 327 | 1387 | 1420 | 10483 | 180641 | 41839 | 10838488 | 1171484 |
| ostrowski  | Boguty-Pianki     | 1273 | 343 | 610  | 184 | 924  | 860  | 7231  | 118032 | 27338 | 7081896  | 765451  |
| ostrowski  | Brok              | 80   | 44  | 73   | 61  | 48   | 34   | 468   | 8673   | 2009  | 520350   | 56242   |
| ostrowski  | Małkinia Górna    | 360  | 190 | 323  | 110 | 195  | 188  | 1372  | 26893  | 6229  | 1613577  | 174404  |
| ostrowski  | Nur               | 918  | 365 | 638  | 178 | 576  | 576  | 4607  | 79842  | 18492 | 4790506  | 517785  |
| ostrowski  | Ostrów Mazowiecka | 1191 | 699 | 1189 | 322 | 639  | 512  | 4536  | 88535  | 20506 | 5312122  | 574164  |
| ostrowski  | Stary Lubotyń     | 1752 | 507 | 733  | 228 | 1175 | 1021 | 8807  | 144373 | 33439 | 8662386  | 936279  |
| ostrowski  | Szulborze Wielkie | 664  | 255 | 387  | 114 | 392  | 431  | 2989  | 52356  | 12126 | 3141350  | 339534  |
| ostrowski  | Wąsewo            | 814  | 404 | 560  | 225 | 500  | 501  | 3556  | 65345  | 15135 | 3920725  | 423774  |
| ostrowski  | Zaręby Kościelne  | 776  | 348 | 590  | 230 | 477  | 433  | 3639  | 65731  | 15224 | 3943882  | 426277  |
| otwocki    | Celestynów        | 42   | 26  | 42   | 40  | 19   | 9    | 154   | 3458   | 801   | 207496   | 22427   |
| otwocki    | Józefów           | 0    | 0   | 0    | 5   | 0    | 0    | 2     | 115    | 27    | 6901     | 746     |
| otwocki    | Karczew           | 15   | 10  | 18   | 73  | 15   | 8    | 116   | 3179   | 736   | 190742   | 20616   |
| otwocki    | Kołbiel           | 280  | 197 | 239  | 173 | 98   | 126  | 725   | 17760  | 4114  | 1065622  | 115178  |
| otwocki    | Osieck            | 92   | 64  | 68   | 47  | 44   | 32   | 373   | 7221   | 1672  | 433242   | 46827   |
| otwocki    | Otwock            | 0    | 0   | 0    | 4   | 0    | 0    | 2     | 97     | 22    | 5828     | 630     |
| otwocki    | Sobienie-Jeziory  | 98   | 36  | 38   | 41  | 26   | 28   | 320   | 5924   | 1372  | 355412   | 38415   |
| otwocki    | Wiązowna          | 90   | 64  | 100  | 93  | 45   | 31   | 412   | 8859   | 2052  | 531546   | 57452   |

|              |                     |      |     |     |     |     |     |      |       |       |         |        |
|--------------|---------------------|------|-----|-----|-----|-----|-----|------|-------|-------|---------|--------|
| piaseczyński | Góra Kalwaria       | 9    | 3   | 7   | 8   | 10  | 6   | 77   | 1327  | 307   | 79632   | 8607   |
| piaseczyński | Konstancin-Jeziorna | 102  | 3   | 4   | 12  | 83  | 101 | 438  | 7411  | 1717  | 444667  | 48062  |
| piaseczyński | Lesznów             | 67   | 12  | 43  | 21  | 33  | 37  | 262  | 4843  | 1122  | 290579  | 31407  |
| piaseczyński | Piaseczno           | 22   | 14  | 28  | 51  | 15  | 63  | 226  | 4885  | 1131  | 293071  | 31677  |
| piaseczyński | Prażmów             | 147  | 81  | 104 | 71  | 44  | 43  | 450  | 9285  | 2151  | 557119  | 60216  |
| piaseczyński | Tarczyn             | 25   | 37  | 89  | 106 | 16  | 11  | 234  | 6161  | 1427  | 369636  | 39952  |
| Płock        | Płock               | 58   | 97  | 206 | 10  | 47  | 19  | 119  | 4663  | 1080  | 279805  | 30243  |
| płocki       | Bielsk              | 787  | 419 | 677 | 142 | 380 | 374 | 2973 | 55853 | 12936 | 3351184 | 362215 |
| płocki       | Bodzanów            | 622  | 350 | 592 | 160 | 274 | 316 | 1997 | 41253 | 9555  | 2475154 | 267528 |
| płocki       | Brudzeń Duży        | 799  | 505 | 997 | 178 | 326 | 343 | 1998 | 47137 | 10918 | 2828227 | 305690 |
| płocki       | Bulkowo             | 721  | 459 | 686 | 143 | 417 | 422 | 2923 | 55983 | 12966 | 3359006 | 363060 |
| płocki       | Drobin              | 1289 | 423 | 753 | 141 | 775 | 757 | 5547 | 95916 | 22215 | 5754949 | 622027 |
| płocki       | Gąbin               | 314  | 285 | 442 | 104 | 120 | 130 | 814  | 20267 | 4694  | 1215991 | 131431 |
| płocki       | Łąck                | 67   | 30  | 33  | 27  | 12  | 18  | 108  | 2674  | 619   | 160453  | 17343  |
| płocki       | Mała Wieś           | 747  | 449 | 944 | 163 | 302 | 357 | 2228 | 49003 | 11350 | 2940180 | 317791 |
| płocki       | Nowy Duninów        | 50   | 31  | 43  | 9   | 20  | 32  | 169  | 3379  | 783   | 202742  | 21913  |
| płocki       | Radzanowo           | 522  | 387 | 545 | 119 | 287 | 253 | 1662 | 35113 | 8133  | 2106783 | 227713 |
| płocki       | Słubice             | 313  | 230 | 463 | 119 | 104 | 72  | 567  | 16726 | 3874  | 1003550 | 108469 |
| płocki       | Słupno              | 245  | 197 | 285 | 47  | 98  | 75  | 564  | 13330 | 3087  | 799811  | 86448  |
| płocki       | Stara Biała         | 582  | 380 | 738 | 118 | 168 | 142 | 1095 | 28319 | 6559  | 1699152 | 183654 |
| płocki       | Staroźreby          | 770  | 410 | 577 | 133 | 437 | 442 | 3072 | 56782 | 13151 | 3406892 | 368236 |
| płocki       | Wyszogród           | 508  | 266 | 478 | 118 | 265 | 253 | 1770 | 35215 | 8156  | 2112917 | 228376 |
| płoński      | Baboszewo           | 1089 | 433 | 639 | 155 | 649 | 681 | 4467 | 79593 | 18435 | 4775592 | 516172 |
| płoński      | Czerwińsk           | 0    | 0   | 3   | 0   | 0   | 0   | 0    | 31    | 7     | 1840    | 199    |
| płoński      | Czerwińsk nad Wisłą | 248  | 172 | 329 | 99  | 93  | 103 | 688  | 16472 | 3815  | 988329  | 106824 |
| płoński      | Dzierżążnia         | 669  | 348 | 492 | 128 | 406 | 365 | 2762 | 50524 | 11702 | 3031429 | 327654 |
| płoński      | Joniec              | 163  | 131 | 148 | 33  | 91  | 50  | 397  | 8852  | 2050  | 531124  | 57407  |
| płoński      | Naruszewo           | 879  | 356 | 623 | 148 | 492 | 484 | 2908 | 56066 | 12986 | 3363990 | 363599 |
| płoński      | Nowe Miasto         | 291  | 187 | 248 | 117 | 156 | 152 | 961  | 20337 | 4710  | 1220247 | 131891 |

|             |                  |      |      |      |     |      |      |       |        |       |          |         |
|-------------|------------------|------|------|------|-----|------|------|-------|--------|-------|----------|---------|
| płoński     | Płońsk           | 496  | 230  | 332  | 152 | 332  | 289  | 2209  | 40405  | 9358  | 2424315  | 262033  |
| płoński     | Raciąż           | 2197 | 823  | 1235 | 240 | 1391 | 1302 | 9958  | 170196 | 39419 | 10211744 | 1103742 |
| płoński     | Sochocin         | 511  | 280  | 447  | 142 | 279  | 258  | 1855  | 36578  | 8472  | 2194697  | 237215  |
| płoński     | Załużki          | 157  | 156  | 251  | 105 | 61   | 50   | 270   | 9540   | 2209  | 572378   | 61866   |
| pruszkowski | Brwinów          | 0    | 1    | 0    | 9   | 2    | 1    | 39    | 681    | 158   | 40870    | 4418    |
| pruszkowski | Michałowice      | 5    | 0    | 0    | 5   | 0    | 0    | 16    | 304    | 70    | 18212    | 1968    |
| pruszkowski | Nadarzyn         | 16   | 18   | 35   | 69  | 5    | 3    | 96    | 2969   | 688   | 178128   | 19253   |
| pruszkowski | Piastów          | 0    | 0    | 0    | 0   | 0    | 0    | 0     | 0      | 0     | 0        | 0       |
| pruszkowski | Pruszków         | 0    | 0    | 0    | 0   | 0    | 0    | 3     | 38     | 9     | 2300     | 249     |
| pruszkowski | Raszyn           | 22   | 2    | 19   | 7   | 23   | 31   | 176   | 3024   | 700   | 181425   | 19609   |
| przasnyski  | Chorzele         | 1412 | 551  | 583  | 533 | 1975 | 987  | 13778 | 214062 | 49579 | 12843747 | 1388223 |
| przasnyski  | Czernice Borowe  | 1280 | 476  | 589  | 643 | 867  | 776  | 6700  | 118689 | 27490 | 7121348  | 769715  |
| przasnyski  | Jednorzec        | 820  | 283  | 367  | 361 | 991  | 553  | 7304  | 115667 | 26790 | 6940000  | 750114  |
| przasnyski  | Krasne           | 1117 | 722  | 1053 | 215 | 466  | 441  | 3015  | 64349  | 14904 | 3860953  | 417313  |
| przasnyski  | Krzynowłoga Mała | 1322 | 566  | 819  | 431 | 1062 | 800  | 8504  | 141721 | 32824 | 8503275  | 919081  |
| przasnyski  | Przasnysz        | 2114 | 1061 | 1413 | 553 | 1338 | 1399 | 10550 | 186723 | 43247 | 11203408 | 1210927 |
| przysuski   | Borkowice        | 54   | 33   | 37   | 22  | 29   | 24   | 250   | 4554   | 1055  | 273211   | 29530   |
| przysuski   | Gielniów         | 70   | 43   | 76   | 45  | 21   | 26   | 322   | 6343   | 1469  | 380563   | 41133   |
| przysuski   | Klwów            | 96   | 76   | 101  | 118 | 49   | 48   | 552   | 11352  | 2629  | 681148   | 73622   |
| przysuski   | Odrzywół         | 184  | 146  | 180  | 102 | 91   | 57   | 796   | 15682  | 3632  | 940940   | 101702  |
| przysuski   | Potworów         | 241  | 111  | 253  | 111 | 106  | 100  | 1009  | 19784  | 4582  | 1187045  | 128302  |
| przysuski   | Przysucha        | 89   | 64   | 75   | 69  | 39   | 23   | 366   | 7479   | 1732  | 448770   | 48506   |
| przysuski   | Rusinów          | 175  | 83   | 164  | 120 | 96   | 75   | 894   | 17038  | 3946  | 1022259  | 110491  |
| przysuski   | Wieniawa         | 294  | 291  | 330  | 172 | 103  | 82   | 1072  | 23064  | 5342  | 1383844  | 149574  |
| pułtuski    | Gzy              | 841  | 427  | 679  | 164 | 477  | 476  | 3464  | 64091  | 14844 | 3845464  | 415639  |
| pułtuski    | Obryte           | 642  | 367  | 615  | 170 | 403  | 296  | 2673  | 50700  | 11743 | 3041972  | 328793  |
| pułtuski    | Pokrzywnica      | 472  | 338  | 548  | 128 | 330  | 253  | 1966  | 39071  | 9049  | 2344261  | 253381  |
| pułtuski    | Pułtusk          | 529  | 299  | 539  | 98  | 321  | 256  | 1657  | 34449  | 7979  | 2066948  | 223407  |
| pułtuski    | Świercze         | 700  | 338  | 590  | 109 | 376  | 365  | 3111  | 55552  | 12867 | 3333126  | 360263  |

|           |                  |      |     |      |     |     |     |      |        |       |         |        |
|-----------|------------------|------|-----|------|-----|-----|-----|------|--------|-------|---------|--------|
| pułtusi   | Winnica          | 743  | 459 | 769  | 145 | 475 | 414 | 3064 | 58853  | 13631 | 3531152 | 381667 |
| pułtusi   | Zatory           | 644  | 537 | 1121 | 298 | 331 | 249 | 1535 | 43518  | 10079 | 2611107 | 282223 |
| Radom     | Radom            | 56   | 50  | 52   | 29  | 29  | 17  | 175  | 3871   | 897   | 232264  | 25104  |
| radomski  | Gózd             | 367  | 246 | 383  | 103 | 181 | 184 | 1336 | 27055  | 6266  | 1623277 | 175453 |
| radomski  | Iłża             | 246  | 358 | 397  | 137 | 122 | 102 | 891  | 21252  | 4922  | 1275112 | 137821 |
| radomski  | Jastrzębia       | 320  | 240 | 312  | 99  | 162 | 112 | 961  | 20543  | 4758  | 1232554 | 133221 |
| radomski  | Jedlińsk         | 595  | 471 | 641  | 208 | 225 | 186 | 1680 | 37456  | 8675  | 2247376 | 242909 |
| radomski  | Jedlnia-Letnisko | 234  | 195 | 279  | 68  | 92  | 50  | 409  | 11356  | 2630  | 681378  | 73647  |
| radomski  | Kowala           | 108  | 120 | 82   | 71  | 67  | 29  | 462  | 9234   | 2139  | 554013  | 59881  |
| radomski  | Pionki           | 223  | 118 | 227  | 115 | 91  | 121 | 700  | 15790  | 3657  | 947420  | 102402 |
| radomski  | Przytyk          | 430  | 302 | 470  | 259 | 190 | 149 | 1400 | 31565  | 7311  | 1893919 | 204705 |
| radomski  | Skaryszew        | 888  | 501 | 742  | 278 | 575 | 462 | 3978 | 73950  | 17128 | 4437012 | 479577 |
| radomski  | Wierzbica        | 451  | 276 | 289  | 100 | 230 | 181 | 1633 | 30269  | 7011  | 1816127 | 196297 |
| radomski  | Wolanów          | 165  | 140 | 188  | 69  | 89  | 71  | 701  | 14036  | 3251  | 842138  | 91023  |
| radomski  | Zakrzew          | 210  | 197 | 267  | 135 | 93  | 73  | 672  | 15994  | 3704  | 959650  | 103724 |
| Siedlce   | Siedlce          | 0    | 2   | 0    | 0   | 0   | 0   | 8    | 110    | 25    | 6594    | 713    |
| siedlecki | Domanice         | 158  | 100 | 162  | 37  | 103 | 61  | 618  | 11921  | 2761  | 715271  | 77310  |
| siedlecki | Korczew          | 333  | 266 | 394  | 91  | 159 | 127 | 974  | 21670  | 5019  | 1300224 | 140535 |
| siedlecki | Kotuń            | 594  | 259 | 340  | 129 | 272 | 268 | 2278 | 40812  | 9452  | 2448699 | 264669 |
| siedlecki | Mokobody         | 1269 | 420 | 715  | 126 | 798 | 800 | 6061 | 102306 | 23695 | 6138349 | 663467 |
| siedlecki | Mordy            | 1154 | 528 | 783  | 136 | 582 | 571 | 3874 | 72254  | 16735 | 4335257 | 468579 |
| siedlecki | Paprotnia        | 915  | 654 | 1099 | 120 | 395 | 381 | 2448 | 54340  | 12586 | 3260395 | 352402 |
| siedlecki | Przesmyki        | 753  | 394 | 660  | 120 | 310 | 328 | 2033 | 42373  | 9814  | 2542364 | 274793 |
| siedlecki | Siedlce          | 202  | 157 | 208  | 88  | 86  | 86  | 552  | 12954  | 3000  | 777228  | 84007  |
| siedlecki | Skórzec          | 360  | 228 | 408  | 121 | 141 | 138 | 981  | 22389  | 5186  | 1343357 | 145197 |
| siedlecki | Suchożebry       | 853  | 450 | 691  | 120 | 360 | 481 | 2880 | 55677  | 12895 | 3340603 | 361071 |
| siedlecki | Wiśniew          | 880  | 535 | 898  | 220 | 329 | 410 | 2387 | 52815  | 12232 | 3168878 | 342510 |
| siedlecki | Wodynie          | 355  | 195 | 316  | 109 | 203 | 181 | 1376 | 26823  | 6213  | 1609398 | 173953 |
| siedlecki | Zbuczyn          | 1040 | 733 | 1340 | 149 | 431 | 337 | 2250 | 55023  | 12744 | 3301381 | 356832 |

|              |                    |      |     |      |     |      |      |       |        |       |          |         |
|--------------|--------------------|------|-----|------|-----|------|------|-------|--------|-------|----------|---------|
| siedlecki    | Zbuczyn Poduchowny | 906  | 430 | 839  | 172 | 418  | 429  | 3118  | 60878  | 14100 | 3652652  | 394799  |
| sierpecki    | Gozdowo            | 1112 | 548 | 789  | 174 | 611  | 504  | 3564  | 68456  | 15855 | 4107364  | 443947  |
| sierpecki    | Mochowo            | 590  | 386 | 578  | 169 | 312  | 246  | 1585  | 35512  | 8225  | 2130707  | 230299  |
| sierpecki    | Rościszewo         | 1255 | 600 | 1002 | 200 | 696  | 613  | 4261  | 81920  | 18974 | 4915226  | 531265  |
| sierpecki    | Sierpc             | 876  | 652 | 1060 | 175 | 436  | 376  | 2642  | 57428  | 13301 | 3445692  | 372430  |
| sierpecki    | Szczutowo          | 747  | 386 | 422  | 207 | 507  | 426  | 3326  | 59736  | 13835 | 3584138  | 387394  |
| sierpecki    | Zawidz             | 2492 | 904 | 1414 | 373 | 1567 | 1332 | 11819 | 200047 | 46333 | 12002797 | 1297329 |
| sochaczewski | Brochów            | 59   | 48  | 70   | 76  | 33   | 48   | 324   | 7131   | 1652  | 427836   | 46243   |
| sochaczewski | Łłów               | 180  | 201 | 422  | 123 | 105  | 85   | 630   | 16954  | 3927  | 1017237  | 109949  |
| sochaczewski | Młodzieszyn        | 225  | 154 | 253  | 143 | 156  | 117  | 802   | 18211  | 4218  | 1092652  | 118100  |
| sochaczewski | Nowa Sucha         | 289  | 150 | 226  | 109 | 188  | 168  | 1344  | 25005  | 5791  | 1500283  | 162159  |
| sochaczewski | Rybno              | 221  | 132 | 195  | 137 | 130  | 104  | 868   | 18029  | 4176  | 1081763  | 116923  |
| sochaczewski | Sochaczew          | 198  | 89  | 196  | 137 | 80   | 83   | 607   | 14089  | 3263  | 845320   | 91367   |
| sochaczewski | Teresin            | 103  | 37  | 62   | 40  | 43   | 51   | 425   | 7807   | 1808  | 468400   | 50627   |
| sokołowski   | Bielany            | 2106 | 689 | 1072 | 228 | 956  | 981  | 7292  | 128605 | 29786 | 7716308  | 834021  |
| sokołowski   | Ceranów            | 601  | 245 | 371  | 90  | 376  | 331  | 2792  | 48002  | 11118 | 2880139  | 311301  |
| sokołowski   | Jabłonna Lacka     | 826  | 520 | 860  | 208 | 383  | 470  | 2686  | 56692  | 13131 | 3401525  | 367656  |
| sokołowski   | Kosów Lacki        | 999  | 493 | 754  | 190 | 652  | 652  | 5039  | 88478  | 20493 | 5308671  | 573791  |
| sokołowski   | Repki              | 1770 | 899 | 1326 | 204 | 960  | 965  | 6341  | 118632 | 27476 | 7117898  | 769342  |
| sokołowski   | Sabnie             | 413  | 364 | 418  | 132 | 156  | 164  | 1245  | 27009  | 6256  | 1620517  | 175154  |
| sokołowski   | Sokołów Podlaski   | 960  | 498 | 722  | 222 | 545  | 581  | 3320  | 65563  | 15185 | 3933761  | 425183  |
| sokołowski   | Sterdyń            | 1017 | 402 | 634  | 171 | 644  | 676  | 4785  | 83565  | 19355 | 5013914  | 541932  |
| szydłowiecki | Chlewiska          | 45   | 38  | 42   | 30  | 15   | 12   | 195   | 3870   | 896   | 232225   | 25100   |
| szydłowiecki | Jastrząb           | 89   | 34  | 28   | 18  | 39   | 43   | 433   | 7032   | 1629  | 421932   | 45605   |
| szydłowiecki | Mirów              | 62   | 74  | 82   | 51  | 49   | 33   | 509   | 9184   | 2127  | 551022   | 59558   |
| szydłowiecki | Orońsko            | 141  | 129 | 161  | 67  | 51   | 44   | 441   | 9891   | 2291  | 593465   | 64145   |
| szydłowiecki | Szydłowiec         | 72   | 44  | 48   | 42  | 40   | 16   | 321   | 5968   | 1382  | 358096   | 38705   |
| Warszawa     | Białołęka          | 0    | 0   | 0    | 0   | 0    | 0    | 0     | 0      | 0     | 0        | 0       |
| Warszawa     | Targówek           | 0    | 0   | 0    | 0   | 0    | 0    | 1     | 13     | 3     | 767      | 83      |

|                     |                   |      |     |     |     |     |     |      |       |       |         |        |
|---------------------|-------------------|------|-----|-----|-----|-----|-----|------|-------|-------|---------|--------|
| Warszawa            | Ursynów           | 0    | 0   | 0   | 0   | 0   | 0   | 0    | 0     | 0     | 0       | 0      |
| Warszawa            | Ursynów dzielnica | 0    | 0   | 0   | 0   | 0   | 0   | 0    | 0     | 0     | 0       | 0      |
| Warszawa            | Warszawa          | 1    | 0   | 1   | 32  | 0   | 1   | 41   | 1119  | 259   | 67133   | 7256   |
| Warszawa            | Wawer             | 0    | 0   | 0   | 0   | 0   | 0   | 1    | 13    | 3     | 767     | 83     |
| warszawski zachodni | Błonie            | 101  | 11  | 2   | 42  | 50  | 79  | 460  | 7886  | 1826  | 473154  | 51141  |
| warszawski zachodni | Izabelin          | 0    | 0   | 0   | 4   | 0   | 0   | 1    | 84    | 20    | 5061    | 547    |
| warszawski zachodni | Kampinos          | 101  | 56  | 85  | 60  | 56  | 46  | 392  | 8046  | 1863  | 482739  | 52177  |
| warszawski zachodni | Leszno            | 132  | 82  | 112 | 52  | 53  | 46  | 461  | 9208  | 2133  | 552479  | 59715  |
| warszawski zachodni | Łomianki          | 4    | 1   | 3   | 7   | 3   | 0   | 27   | 524   | 121   | 31439   | 3398   |
| warszawski zachodni | Ożarów Mazowiecki | 32   | 20  | 11  | 7   | 37  | 13  | 197  | 3168  | 734   | 190090  | 20546  |
| warszawski zachodni | Stare Babice      | 11   | 1   | 2   | 12  | 0   | 0   | 18   | 490   | 114   | 29407   | 3178   |
| węgrowski           | Grębków           | 1144 | 522 | 688 | 165 | 836 | 695 | 5443 | 94053 | 21784 | 5643188 | 609947 |
| węgrowski           | Korytnica         | 1278 | 716 | 938 | 257 | 737 | 674 | 5387 | 97946 | 22685 | 5876755 | 635192 |
| węgrowski           | Liw               | 1175 | 510 | 762 | 182 | 688 | 586 | 4840 | 85739 | 19858 | 5144346 | 556029 |
| węgrowski           | Łochów            | 119  | 83  | 107 | 114 | 98  | 76  | 758  | 14520 | 3363  | 871200  | 94164  |
| węgrowski           | Miedzna           | 819  | 400 | 601 | 100 | 435 | 418 | 3008 | 55421 | 12836 | 3325267 | 359413 |
| węgrowski           | Sadowne           | 346  | 127 | 220 | 329 | 319 | 241 | 2580 | 45945 | 10641 | 2756723 | 297962 |
| węgrowski           | Stoczek           | 335  | 221 | 275 | 121 | 267 | 172 | 1939 | 34029 | 7881  | 2041720 | 220680 |
| węgrowski           | Węgrów            | 174  | 58  | 83  | 27  | 90  | 91  | 730  | 12492 | 2893  | 749547  | 81015  |
| węgrowski           | Wierzbnio         | 623  | 399 | 482 | 134 | 330 | 322 | 2453 | 45956 | 10644 | 2757374 | 298032 |
| wołomiński          | Dąbrówka          | 178  | 119 | 196 | 132 | 132 | 129 | 1246 | 22912 | 5307  | 1374719 | 148587 |
| wołomiński          | Jadów             | 223  | 80  | 112 | 176 | 139 | 115 | 1230 | 22456 | 5201  | 1347383 | 145633 |
| wołomiński          | Klembów           | 281  | 153 | 183 | 179 | 152 | 154 | 1275 | 24651 | 5709  | 1479042 | 159863 |

|             |                           |      |     |     |     |     |     |      |        |       |         |        |
|-------------|---------------------------|------|-----|-----|-----|-----|-----|------|--------|-------|---------|--------|
| wołomiński  | Kobyłka                   | 0    | 0   | 0   | 0   | 0   | 0   | 7    | 89     | 21    | 5368    | 580    |
| wołomiński  | Marki                     | 0    | 0   | 0   | 0   | 0   | 0   | 1    | 13     | 3     | 767     | 83     |
| wołomiński  | Poświętne                 | 196  | 152 | 175 | 248 | 131 | 94  | 1166 | 23550  | 5454  | 1412982 | 152723 |
| wołomiński  | Radzymin                  | 98   | 47  | 81  | 156 | 97  | 58  | 763  | 14703  | 3405  | 882203  | 95353  |
| wołomiński  | Strachówka                | 231  | 136 | 165 | 125 | 128 | 113 | 1211 | 22010  | 5098  | 1320621 | 142740 |
| wołomiński  | Tłuszcz                   | 144  | 95  | 125 | 158 | 111 | 97  | 1009 | 19058  | 4414  | 1143452 | 123591 |
| wołomiński  | Wołomin                   | 34   | 29  | 46  | 35  | 15  | 12  | 240  | 4520   | 1047  | 271217  | 29315  |
| wołomiński  | Zielonka                  | 0    | 0   | 0   | 0   | 0   | 0   | 2    | 26     | 6     | 1534    | 166    |
| wyszkowski  | Brańszczyk                | 241  | 123 | 196 | 74  | 186 | 117 | 1639 | 27117  | 6281  | 1627035 | 175859 |
| wyszkowski  | Długosiodło               | 364  | 189 | 298 | 118 | 255 | 174 | 2171 | 37082  | 8589  | 2224947 | 240485 |
| wyszkowski  | Rząśnik                   | 647  | 305 | 373 | 130 | 483 | 381 | 3566 | 59870  | 13867 | 3592190 | 388264 |
| wyszkowski  | Somianka                  | 709  | 555 | 980 | 255 | 392 | 301 | 2370 | 52938  | 12261 | 3176277 | 343310 |
| wyszkowski  | Wyszków                   | 263  | 228 | 421 | 147 | 234 | 156 | 1255 | 26844  | 6217  | 1610625 | 174085 |
| wyszkowski  | Zabrodzie                 | 295  | 165 | 250 | 129 | 200 | 189 | 1831 | 32162  | 7449  | 1929691 | 208572 |
| zwoleński   | Kazanów                   | 473  | 216 | 429 | 100 | 265 | 255 | 2112 | 38525  | 8923  | 2311480 | 249838 |
| zwoleński   | Policzna                  | 463  | 316 | 519 | 96  | 263 | 207 | 1611 | 32836  | 7605  | 1970178 | 212948 |
| zwoleński   | Przyłęk                   | 214  | 147 | 183 | 58  | 134 | 100 | 975  | 17879  | 4141  | 1072753 | 115949 |
| zwoleński   | Tczów                     | 427  | 203 | 379 | 73  | 201 | 230 | 1463 | 28597  | 6623  | 1715830 | 185456 |
| zwoleński   | Zwoleń                    | 356  | 158 | 339 | 116 | 218 | 206 | 1460 | 28430  | 6585  | 1705823 | 184375 |
| żuromiński  | Biežuń                    | 1262 | 467 | 718 | 479 | 993 | 730 | 7461 | 126743 | 29355 | 7604586 | 821946 |
| żuromiński  | Kuczbork-Osada            | 622  | 369 | 564 | 272 | 525 | 358 | 3403 | 62403  | 14453 | 3744208 | 404695 |
| żuromiński  | Lubowidz                  | 802  | 619 | 775 | 444 | 654 | 460 | 3735 | 74722  | 17307 | 4483326 | 484583 |
| żuromiński  | Lutocin                   | 1362 | 481 | 720 | 477 | 978 | 866 | 7688 | 131207 | 30389 | 7872429 | 850896 |
| żuromiński  | Siemiątkowo               | 358  | 184 | 285 | 69  | 312 | 280 | 1971 | 34788  | 8057  | 2087306 | 225608 |
| żuromiński  | Siemiątkowo Koziebrodzkie | 564  | 193 | 307 | 264 | 377 | 344 | 3418 | 58328  | 13509 | 3499675 | 378264 |
| żuromiński  | Żuromin                   | 855  | 466 | 664 | 463 | 653 | 472 | 4491 | 83223  | 19275 | 4993363 | 539710 |
| żyrardowski | Mszczonów                 | 62   | 74  | 103 | 144 | 42  | 30  | 489  | 10749  | 2490  | 644955  | 69710  |
| żyrardowski | Puszcza Mariańska         | 73   | 49  | 64  | 73  | 61  | 36  | 443  | 8552   | 1981  | 513104  | 55459  |
| żyrardowski | Radziejowice              | 31   | 19  | 22  | 27  | 30  | 15  | 169  | 3268   | 757   | 196109  | 21197  |

|             |          |     |    |     |    |     |     |     |       |      |        |       |
|-------------|----------|-----|----|-----|----|-----|-----|-----|-------|------|--------|-------|
| żyrardowski | Wiskitki | 185 | 96 | 163 | 61 | 113 | 118 | 765 | 14897 | 3450 | 893820 | 96609 |
| żyrardowski | Żyrardów | 0   | 0  | 0   | 2  | 0   | 0   | 3   | 74    | 17   | 4447   | 481   |

| PODLASKIE Voivodeship |                      |        |                   |                    |                  |                     |                      |            |                    |                    |                                   |                                   |
|-----------------------|----------------------|--------|-------------------|--------------------|------------------|---------------------|----------------------|------------|--------------------|--------------------|-----------------------------------|-----------------------------------|
| Province              | Community            | Calves | Bulls 6-12 months | Bulls 12-24 months | Bulls >24 months | Heifers 6-12 months | Heifers 12-18 months | Dairy cows | Manure mass (tons) | Slurry volume (m³) | Amount of biogas from manure (m³) | Amount of biogas from slurry (m³) |
| augustowski           | Augustów             | 2736   | 963               | 1317               | 166              | 1981                | 1775                 | 13553      | 210894             | 69859              | 12653669                          | 1956062                           |
| augustowski           | Bargłów Kościelny    | 2512   | 710               | 1006               | 150              | 1823                | 1719                 | 13766      | 207772             | 68825              | 12466307                          | 1927098                           |
| augustowski           | Lipsk                | 1123   | 564               | 891                | 106              | 743                 | 579                  | 4553       | 77352              | 25623              | 4641118                           | 717445                            |
| augustowski           | Nowinka              | 473    | 273               | 363                | 44               | 318                 | 230                  | 1788       | 30906              | 10238              | 1854335                           | 286652                            |
| augustowski           | Płaska               | 53     | 60                | 64                 | 11               | 68                  | 45                   | 373        | 6271               | 2077               | 376274                            | 58166                             |
| augustowski           | Sztabin              | 1749   | 764               | 1062               | 143              | 1209                | 981                  | 8180       | 130589             | 43258              | 7835354                           | 1211225                           |
| białostocki           | Choroszcz            | 521    | 332               | 527                | 76               | 381                 | 255                  | 2218       | 38953              | 12903              | 2337194                           | 361294                            |
| białostocki           | Czarna Białostocka   | 217    | 144               | 343                | 35               | 87                  | 91                   | 542        | 12496              | 4139               | 749772                            | 115903                            |
| białostocki           | Dobrzyniewo Duże     | 408    | 157               | 283                | 52               | 346                 | 305                  | 2566       | 39905              | 13219              | 2394325                           | 370126                            |
| białostocki           | Gródek               | 398    | 186               | 221                | 78               | 335                 | 276                  | 2343       | 36836              | 12202              | 2210135                           | 341653                            |
| białostocki           | Juchnowiec Kościelny | 605    | 394               | 605                | 83               | 358                 | 245                  | 2180       | 39560              | 13104              | 2373599                           | 366922                            |
| białostocki           | Łapy                 | 1417   | 852               | 1196               | 149              | 583                 | 710                  | 4127       | 78139              | 25884              | 4688337                           | 724744                            |
| białostocki           | Michałow             | 519    | 201               | 313                | 107              | 382                 | 340                  | 3002       | 47182              | 15629              | 2830938                           | 437619                            |
| białostocki           | Poświętne            | 2651   | 1042              | 1659               | 340              | 1493                | 1471                 | 11457      | 187376             | 62069              | 11242544                          | 1737924                           |
| białostocki           | Supraśl              | 27     | 8                 | 15                 | 3                | 23                  | 7                    | 145        | 2165               | 717                | 129870                            | 20076                             |
| białostocki           | Suraż                | 323    | 247               | 273                | 25               | 213                 | 147                  | 1221       | 21368              | 7078               | 1282085                           | 198190                            |
| białostocki           | Turośń Kościelna     | 311    | 272               | 441                | 103              | 162                 | 85                   | 743        | 17840              | 5910               | 1070428                           | 165472                            |
| białostocki           | Tykocin              | 1875   | 865               | 1467               | 185              | 1199                | 1090                 | 8765       | 143820             | 47641              | 8629209                           | 1333942                           |
| białostocki           | Wasilków             | 33     | 29                | 36                 | 7                | 21                  | 8                    | 155        | 2643               | 875                | 158562                            | 24511                             |
| białostocki           | Zabłudów             | 641    | 368               | 623                | 111              | 397                 | 378                  | 2942       | 50750              | 16811              | 3044973                           | 470706                            |
| białostocki           | Zawady               | 1032   | 451               | 650                | 89               | 807                 | 737                  | 6321       | 97170              | 32188              | 5830207                           | 901260                            |
| Białystok             | Białystok            | 19     | 14                | 14                 | 4                | 14                  | 13                   | 87         | 1507               | 499                | 90437                             | 13980                             |
| bielski               | Bielsk Podlaski      | 1081   | 595               | 987                | 193              | 674                 | 538                  | 5293       | 88022              | 29158              | 5281349                           | 816415                            |

|           |                   |      |      |      |     |      |      |       |        |        |          |         |
|-----------|-------------------|------|------|------|-----|------|------|-------|--------|--------|----------|---------|
| bielski   | Boćki             | 1400 | 732  | 1016 | 171 | 958  | 705  | 7482  | 117930 | 39064  | 7075778  | 1093806 |
| bielski   | Brańsk            | 2327 | 1018 | 1530 | 238 | 1652 | 1528 | 11893 | 190109 | 62974  | 11406548 | 1763276 |
| bielski   | Orla              | 130  | 114  | 128  | 31  | 128  | 54   | 861   | 13722  | 4546   | 823340   | 127276  |
| bielski   | Rudka             | 285  | 106  | 149  | 24  | 277  | 211  | 1676  | 25895  | 8578   | 1553720  | 240181  |
| bielski   | Wyszki            | 1503 | 739  | 1143 | 161 | 818  | 776  | 6412  | 106515 | 35283  | 6390887  | 987932  |
| grajewski | Grajewo           | 2377 | 886  | 1317 | 196 | 1618 | 1458 | 11620 | 182894 | 60584  | 10973648 | 1696356 |
| grajewski | Radziłów          | 6746 | 2348 | 3390 | 495 | 4680 | 4183 | 33854 | 525364 | 174028 | 31521857 | 4872792 |
| grajewski | Rajgród           | 1486 | 326  | 514  | 72  | 1156 | 932  | 8429  | 124405 | 41209  | 7464271  | 1153861 |
| grajewski | Szczuczyn         | 1482 | 644  | 941  | 145 | 1111 | 932  | 7974  | 125247 | 41488  | 7514806  | 1161673 |
| grajewski | Wąsosz            | 1005 | 481  | 733  | 123 | 832  | 698  | 5447  | 87813  | 29088  | 5268806  | 814476  |
| hajnowski | Czeremcha         | 38   | 17   | 18   | 7   | 23   | 16   | 124   | 2147   | 711    | 128825   | 19914   |
| hajnowski | Czyże             | 232  | 131  | 166  | 30  | 161  | 80   | 991   | 16247  | 5382   | 974801   | 150689  |
| hajnowski | Dubicze Cerkiewne | 79   | 86   | 134  | 12  | 76   | 66   | 485   | 8678   | 2875   | 520670   | 80488   |
| hajnowski | Hajnówka          | 441  | 268  | 434  | 54  | 306  | 264  | 2141  | 36205  | 11993  | 2172324  | 335808  |
| hajnowski | Kleszczele        | 167  | 362  | 162  | 34  | 174  | 68   | 623   | 12501  | 4141   | 750060   | 115948  |
| hajnowski | Narew             | 288  | 188  | 228  | 63  | 222  | 145  | 1789  | 28137  | 9320   | 1688204  | 260970  |
| hajnowski | Narewka           | 109  | 67   | 62   | 6   | 73   | 51   | 483   | 7691   | 2548   | 461484   | 71338   |
| kolneński | Grabowo           | 2013 | 1125 | 1686 | 319 | 1242 | 1078 | 8426  | 145332 | 48141  | 8719898  | 1347962 |
| kolneński | Kolno             | 3963 | 1899 | 2485 | 452 | 2705 | 2385 | 19248 | 309416 | 102495 | 18564941 | 2869853 |
| kolneński | Mały Płock        | 1613 | 865  | 1194 | 162 | 932  | 748  | 6216  | 105461 | 34934  | 6327664  | 978159  |
| kolneński | Stawiski          | 2415 | 1160 | 1679 | 177 | 1307 | 1254 | 9072  | 153414 | 50819  | 9204848  | 1422927 |
| kolneński | Turośl            | 1482 | 381  | 434  | 116 | 1698 | 937  | 12770 | 178726 | 59203  | 10723532 | 1657692 |
| łomża     | Łomża             | 25   | 46   | 43   | 11  | 27   | 20   | 155   | 2961   | 981    | 177666   | 27464   |
| łomżyński | Jedwabne          | 1912 | 1095 | 1430 | 161 | 1195 | 1217 | 8258  | 139071 | 46068  | 8344273  | 1289896 |
| łomżyński | Łomża             | 2079 | 730  | 1018 | 151 | 1194 | 1206 | 8916  | 141725 | 46947  | 8503484  | 1314507 |
| łomżyński | Miastkowo         | 914  | 481  | 688  | 78  | 490  | 492  | 3667  | 61860  | 20491  | 3711626  | 573760  |
| łomżyński | Nowogród          | 845  | 428  | 536  | 66  | 454  | 405  | 3392  | 55612  | 18422  | 3336722  | 515806  |
| łomżyński | Piątnica          | 1802 | 1120 | 1534 | 318 | 852  | 931  | 5752  | 108509 | 35944  | 6510520  | 1006426 |
| łomżyński | Przytuły          | 951  | 434  | 727  | 179 | 566  | 531  | 4520  | 74729  | 24754  | 4483746  | 693118  |

|             |                     |      |      |      |     |      |      |       |        |       |          |         |
|-------------|---------------------|------|------|------|-----|------|------|-------|--------|-------|----------|---------|
| łomżyński   | Śniadowo            | 3244 | 577  | 877  | 224 | 2110 | 2402 | 17782 | 264468 | 87606 | 15868090 | 2452962 |
| łomżyński   | Wizna               | 2033 | 785  | 1061 | 156 | 1138 | 1128 | 8041  | 130873 | 43352 | 7852367  | 1213855 |
| łomżyński   | Zbójna              | 815  | 262  | 453  | 90  | 875  | 412  | 5909  | 86392  | 28618 | 5183523  | 801293  |
| moniecki    | Goniądz             | 1440 | 526  | 838  | 92  | 894  | 784  | 6602  | 104175 | 34508 | 6250491  | 966229  |
| moniecki    | Jasionówka          | 936  | 637  | 892  | 102 | 567  | 445  | 3329  | 60592  | 20071 | 3635499  | 561992  |
| moniecki    | Jaświły             | 2192 | 1114 | 1668 | 202 | 1240 | 1160 | 7769  | 136361 | 45170 | 8181638  | 1264755 |
| moniecki    | Knyszyn             | 796  | 464  | 607  | 75  | 476  | 378  | 2697  | 47957  | 15886 | 2877400  | 444802  |
| moniecki    | Krypno              | 1156 | 434  | 586  | 81  | 786  | 750  | 6053  | 93412  | 30943 | 5604709  | 866401  |
| moniecki    | Mońki               | 1695 | 844  | 1373 | 142 | 908  | 856  | 6611  | 112615 | 37304 | 6756888  | 1044510 |
| moniecki    | Trzcianne           | 1391 | 759  | 1070 | 130 | 780  | 737  | 5630  | 95254  | 31553 | 5715259  | 883491  |
| sejneński   | Giby                | 378  | 291  | 387  | 40  | 280  | 182  | 1161  | 22831  | 7563  | 1369854  | 211758  |
| sejneński   | Krasnopol           | 994  | 609  | 815  | 98  | 688  | 466  | 3988  | 68344  | 22639 | 4100623  | 633893  |
| sejneński   | Puńsk               | 1963 | 1012 | 1281 | 209 | 1320 | 1173 | 8794  | 144707 | 47935 | 8682411  | 1342167 |
| sejneński   | Sejny               | 1597 | 1128 | 1596 | 175 | 1063 | 701  | 5748  | 104860 | 34735 | 6291619  | 972587  |
| siemiatycki | Drohiczyn           | 1739 | 700  | 1114 | 146 | 971  | 928  | 6772  | 112606 | 37301 | 6756383  | 1044432 |
| siemiatycki | Dziadkowice         | 686  | 302  | 414  | 62  | 441  | 416  | 3139  | 50650  | 16778 | 3039026  | 469786  |
| siemiatycki | Grodzisk            | 1509 | 526  | 713  | 131 | 1096 | 963  | 7890  | 121678 | 40306 | 7300662  | 1128570 |
| siemiatycki | Mielnik             | 81   | 49   | 64   | 7   | 49   | 45   | 419   | 6699   | 2219  | 401938   | 62133   |
| siemiatycki | Milejczyce          | 374  | 141  | 191  | 42  | 248  | 210  | 1750  | 27663  | 9164  | 1659800  | 256579  |
| siemiatycki | Nurzec-Stacja       | 147  | 87   | 131  | 40  | 80   | 62   | 590   | 10484  | 3473  | 629021   | 97237   |
| siemiatycki | Perlejewo           | 1345 | 424  | 688  | 130 | 796  | 879  | 6328  | 100101 | 33159 | 6006070  | 928446  |
| siemiatycki | Siemiatycze         | 1038 | 491  | 644  | 126 | 615  | 562  | 4289  | 71101  | 23552 | 4266070  | 659468  |
| sokółski    | Dąbrowa Białostocka | 1981 | 1338 | 1826 | 286 | 1210 | 868  | 6951  | 126976 | 42061 | 7618579  | 1177715 |
| sokółski    | Janów               | 1709 | 976  | 1585 | 240 | 868  | 830  | 5526  | 103372 | 34242 | 6202299  | 958780  |
| sokółski    | Korycin             | 1789 | 950  | 1575 | 191 | 924  | 797  | 5916  | 107072 | 35468 | 6424336  | 993103  |
| sokółski    | Krynki              | 54   | 19   | 24   | 25  | 54   | 31   | 292   | 4818   | 1596  | 289081   | 44687   |
| sokółski    | Kuźnica             | 372  | 244  | 403  | 75  | 214  | 189  | 1445  | 26635  | 8823  | 1598091  | 247040  |
| sokółski    | Nowy Dwór           | 705  | 493  | 806  | 145 | 455  | 318  | 2211  | 44496  | 14739 | 2669745  | 412701  |

|                  |                     |      |      |      |     |      |      |       |        |       |          |         |
|------------------|---------------------|------|------|------|-----|------|------|-------|--------|-------|----------|---------|
| sokólski         | Sidra               | 684  | 552  | 739  | 128 | 489  | 330  | 2623  | 48929  | 16208 | 2935721  | 453817  |
| sokólski         | Sokółka             | 1006 | 788  | 934  | 230 | 696  | 481  | 4256  | 75768  | 25098 | 4546067  | 702752  |
| sokólski         | Suchowola           | 2636 | 1302 | 2051 | 332 | 1363 | 1445 | 8966  | 161271 | 53422 | 9676280  | 1495803 |
| sokólski         | Szudziałowo         | 319  | 213  | 277  | 56  | 228  | 166  | 1550  | 25988  | 8609  | 1559271  | 241039  |
| suwalski         | Bakałarzewo         | 1075 | 633  | 795  | 78  | 774  | 554  | 4405  | 74214  | 24583 | 4452819  | 688337  |
| suwalski         | Filipów             | 1020 | 859  | 764  | 106 | 946  | 454  | 4919  | 80937  | 26810 | 4856199  | 750693  |
| suwalski         | Jeleniewo           | 1008 | 772  | 998  | 121 | 739  | 407  | 3822  | 68725  | 22765 | 4123476  | 637426  |
| suwalski         | Przerośl            | 836  | 646  | 618  | 122 | 828  | 389  | 4377  | 71141  | 23566 | 4268449  | 659836  |
| suwalski         | Raczki              | 1176 | 735  | 741  | 85  | 861  | 659  | 5073  | 83711  | 27729 | 5022654  | 776425  |
| suwalski         | Rutka-Tartak        | 816  | 536  | 551  | 142 | 765  | 493  | 4633  | 74249  | 24595 | 4454946  | 688666  |
| suwalski         | Suwałki             | 753  | 681  | 676  | 111 | 610  | 447  | 3476  | 60436  | 20020 | 3626163  | 560549  |
| suwalski         | Szypliszki          | 1464 | 899  | 1182 | 167 | 1036 | 669  | 5869  | 100730 | 33367 | 6043809  | 934280  |
| suwalski         | Wiżajny             | 934  | 483  | 437  | 40  | 826  | 437  | 5177  | 77677  | 25731 | 4660619  | 720460  |
| Suwałki          | Suwałki             | 26   | 50   | 42   | 25  | 37   | 18   | 140   | 3040   | 1007  | 182388   | 28194   |
| wysokomazowiecki | Ciechanowiec        | 1553 | 466  | 740  | 105 | 1067 | 1027 | 7746  | 120143 | 39798 | 7208604  | 1114339 |
| wysokomazowiecki | Czyżew              | 2233 | 403  | 835  | 176 | 1416 | 1563 | 11059 | 169465 | 56136 | 10167898 | 1571800 |
| wysokomazowiecki | Czyżew-Osada        | 38   | 8    | 15   | 4   | 39   | 33   | 366   | 5164   | 1711  | 309843   | 47897   |
| wysokomazowiecki | Klukowo             | 2079 | 436  | 703  | 140 | 1376 | 1481 | 10676 | 161898 | 53629 | 9713875  | 1501615 |
| wysokomazowiecki | Kobylin-Borzemy     | 1922 | 786  | 1101 | 160 | 1306 | 1342 | 9731  | 154096 | 51045 | 9245759  | 1429251 |
| wysokomazowiecki | Kulesze Kościelne   | 1781 | 325  | 595  | 120 | 1319 | 1344 | 10313 | 153702 | 50914 | 9222149  | 1425602 |
| wysokomazowiecki | Nowe Piekuty        | 1721 | 320  | 467  | 123 | 1278 | 1286 | 10197 | 150297 | 49786 | 9017846  | 1394020 |
| wysokomazowiecki | Sokoły              | 2016 | 518  | 615  | 95  | 1387 | 1434 | 9696  | 148290 | 49122 | 8897420  | 1375404 |
| wysokomazowiecki | Szepietowo          | 2233 | 445  | 593  | 99  | 1597 | 1776 | 11681 | 176168 | 58356 | 10570088 | 1633972 |
| wysokomazowiecki | Wysokie Mazowieckie | 2487 | 549  | 806  | 132 | 1597 | 1703 | 12078 | 183672 | 60842 | 11020290 | 1703567 |
| zambrowski       | Kołaki Kościelne    | 1344 | 230  | 445  | 39  | 845  | 948  | 7032  | 104832 | 34726 | 6289925  | 972325  |
| zambrowski       | Rutki               | 2158 | 814  | 1189 | 179 | 1380 | 1313 | 10029 | 159356 | 52787 | 9561369  | 1478040 |
| zambrowski       | Szumowo             | 1639 | 742  | 1058 | 128 | 1068 | 1014 | 7616  | 123053 | 40762 | 7383205  | 1141329 |
| zambrowski       | Zambrów             | 3053 | 951  | 1392 | 165 | 1929 | 2076 | 13926 | 219314 | 72648 | 13158840 | 2034153 |

| Wielkopolskie Voivodeship |                    |        |                   |                    |                  |                     |                      |            |                     |                    |                                   |                                   |
|---------------------------|--------------------|--------|-------------------|--------------------|------------------|---------------------|----------------------|------------|---------------------|--------------------|-----------------------------------|-----------------------------------|
| Province                  | Community          | Calves | Bulls 6-12 months | Bulls 12-24 months | Bulls >24 months | Heifers 6-12 months | Heifers 12-18 months | Dairy Cows | Manure mass (tones) | Slurry volume (m³) | Amount of biogas from manure (m³) | Amount of biogas from slurry (m³) |
| chodzieski                | Budzyń             | 572    | 659               | 1097               | 181              | 281                 | 184                  | 1070       | 38662               | 2770               | 2319736                           | 77569                             |
| chodzieski                | Chodzież           | 417    | 378               | 609                | 121              | 231                 | 173                  | 1083       | 30224               | 2166               | 1813468                           | 60640                             |
| chodzieski                | Margonin           | 701    | 578               | 916                | 125              | 214                 | 144                  | 1115       | 35313               | 2530               | 2118809                           | 70850                             |
| chodzieski                | Szamocin           | 325    | 280               | 396                | 106              | 143                 | 157                  | 687        | 20690               | 1483               | 1241392                           | 41511                             |
| czarnkowsko-trzcianecki   | Czarnków           | 1121   | 552               | 1034               | 122              | 525                 | 536                  | 3447       | 76371               | 5472               | 4582289                           | 153226                            |
| czarnkowsko-trzcianecki   | Drawsko            | 322    | 137               | 258                | 53               | 222                 | 162                  | 1615       | 31049               | 2225               | 1862963                           | 62295                             |
| czarnkowsko-trzcianecki   | Krzyż Wielkopolski | 176    | 169               | 157                | 28               | 155                 | 91                   | 1101       | 20814               | 1491               | 1248865                           | 41760                             |
| czarnkowsko-trzcianecki   | Lubasz             | 519    | 207               | 432                | 78               | 285                 | 239                  | 1766       | 37544               | 2690               | 2252646                           | 75326                             |
| czarnkowsko-trzcianecki   | Połajewo           | 1479   | 977               | 1575               | 149              | 718                 | 770                  | 4484       | 103901              | 7445               | 6234033                           | 208458                            |
| czarnkowsko-trzcianecki   | Trzcianka          | 307    | 159               | 270                | 47               | 121                 | 90                   | 849        | 18973               | 1360               | 1138387                           | 38066                             |
| czarnkowsko-trzcianecki   | Wieleń             | 582    | 281               | 396                | 93               | 415                 | 361                  | 2889       | 55814               | 3999               | 3348841                           | 111981                            |
| gnieźniński               | Czarniejewo        | 542    | 189               | 343                | 64               | 140                 | 126                  | 1320       | 27969               | 2004               | 1678136                           | 56115                             |
| gnieźniński               | Gniezno            | 1222   | 1060              | 1532               | 296              | 443                 | 402                  | 2196       | 68211               | 4888               | 4092676                           | 136854                            |
| gnieźniński               | Kiszkowo           | 150    | 212               | 377                | 92               | 55                  | 27                   | 289        | 12009               | 860                | 720519                            | 24093                             |
| gnieźniński               | Kłecko             | 669    | 487               | 775                | 101              | 168                 | 202                  | 1152       | 33763               | 2419               | 2025797                           | 67740                             |
| gnieźniński               | Łubowo             | 576    | 657               | 973                | 218              | 171                 | 117                  | 759        | 32328               | 2316               | 1939661                           | 64860                             |

|             |                       |      |      |      |     |      |      |      |        |       |          |        |
|-------------|-----------------------|------|------|------|-----|------|------|------|--------|-------|----------|--------|
| gnieźniński | Mieleszyn             | 388  | 559  | 826  | 115 | 120  | 63   | 304  | 20471  | 1467  | 1228281  | 41072  |
| gnieźniński | Niechanowo            | 1099 | 841  | 1354 | 161 | 534  | 527  | 2684 | 71055  | 5091  | 4263283  | 142559 |
| gnieźniński | Trzemeszno            | 1362 | 656  | 1159 | 106 | 712  | 669  | 3402 | 80107  | 5740  | 4806448  | 160721 |
| gnieźniński | Witkowo               | 1422 | 895  | 1561 | 189 | 521  | 488  | 2819 | 76312  | 5468  | 4578745  | 153107 |
| gostyński   | Borek Wielkopolski    | 2777 | 2942 | 4254 | 609 | 1068 | 944  | 5919 | 178643 | 12801 | 10718571 | 358415 |
| gostyński   | Gostyń                | 2017 | 1078 | 1500 | 192 | 892  | 907  | 5098 | 116527 | 8350  | 6991620  | 233791 |
| gostyński   | Krobia                | 2851 | 1712 | 2378 | 518 | 1424 | 1377 | 6275 | 161890 | 11600 | 9713380  | 324803 |
| gostyński   | Pępowo                | 1912 | 1173 | 1791 | 308 | 726  | 813  | 5109 | 120711 | 8649  | 7242683  | 242186 |
| gostyński   | Piaski                | 1697 | 782  | 1392 | 219 | 904  | 946  | 4588 | 107123 | 7676  | 6427401  | 214924 |
| gostyński   | Pogorzela             | 2259 | 889  | 1167 | 255 | 904  | 1069 | 6012 | 128607 | 9215  | 7716409  | 258027 |
| gostyński   | Poniec                | 1541 | 920  | 1552 | 182 | 646  | 616  | 3305 | 85341  | 6115  | 5120458  | 171221 |
| grodziski   | Granowo               | 661  | 569  | 1010 | 135 | 270  | 203  | 1108 | 37271  | 2671  | 2236247  | 74777  |
| grodziski   | Grodzisk Wielkopolski | 948  | 681  | 1127 | 168 | 345  | 381  | 2101 | 56835  | 4072  | 3410080  | 114029 |
| grodziski   | Kamieniec             | 1425 | 1127 | 1924 | 261 | 567  | 571  | 2977 | 86269  | 6182  | 5176145  | 173084 |
| grodziski   | Rakoniewice           | 1151 | 1009 | 1561 | 295 | 263  | 313  | 1546 | 57117  | 4093  | 3427034  | 114596 |
| grodziski   | Wielichowo            | 1660 | 1791 | 2971 | 527 | 394  | 328  | 1794 | 86485  | 6197  | 5189085  | 173516 |
| jarociński  | Jaraczewo             | 1511 | 855  | 1472 | 237 | 623  | 676  | 3812 | 92987  | 6663  | 5579195  | 186561 |
| jarociński  | Jarocin               | 964  | 766  | 1193 | 151 | 509  | 519  | 1996 | 58422  | 4186  | 3505312  | 117213 |
| jarociński  | Kotlin                | 481  | 528  | 676  | 146 | 123  | 123  | 587  | 24172  | 1732  | 1450305  | 48496  |
| jarociński  | Żerków                | 1655 | 1449 | 2086 | 289 | 689  | 682  | 3250 | 96209  | 6894  | 5772563  | 193027 |
| kaliski     | Blizanów              | 835  | 565  | 867  | 148 | 512  | 421  | 2289 | 56583  | 4054  | 3395005  | 113525 |
| kaliski     | Brzeziny              | 421  | 330  | 569  | 122 | 238  | 167  | 706  | 24187  | 1733  | 1451244  | 48528  |
| kaliski     | Ceków-Kolonia         | 556  | 457  | 783  | 117 | 168  | 212  | 961  | 31199  | 2236  | 1871931  | 62595  |
| kaliski     | Godziesze Wielkie     | 727  | 709  | 1133 | 301 | 257  | 206  | 921  | 40035  | 2869  | 2402114  | 80324  |
| kaliski     | Kalisz                | 0    | 0    | 0    | 0   | 0    | 0    | 0    | 0      | 0     | 0        | 0      |
| kaliski     | Koźminek              | 414  | 409  | 675  | 100 | 209  | 169  | 839  | 27071  | 1940  | 1624242  | 54313  |
| kaliski     | Lisków                | 988  | 774  | 1171 | 197 | 457  | 396  | 2246 | 61109  | 4379  | 3666566  | 122605 |

|          |                   |      |     |      |     |     |     |      |       |      |         |        |
|----------|-------------------|------|-----|------|-----|-----|-----|------|-------|------|---------|--------|
| kaliski  | Mycielin          | 636  | 421 | 699  | 147 | 298 | 296 | 1629 | 41878 | 3001 | 2512677 | 84021  |
| kaliski  | Opatówek          | 396  | 367 | 552  | 124 | 155 | 122 | 738  | 23727 | 1700 | 1423614 | 47604  |
| kaliski  | Stawiszyn         | 315  | 215 | 365  | 52  | 130 | 135 | 636  | 17930 | 1285 | 1075782 | 35973  |
| kaliski  | Szczytniki        | 512  | 728 | 1098 | 141 | 324 | 220 | 952  | 36957 | 2648 | 2217414 | 74147  |
| kaliski  | Żelazków          | 785  | 596 | 886  | 142 | 339 | 294 | 1708 | 46250 | 3314 | 2775014 | 92793  |
| Kalisz   | Kalisz            | 64   | 55  | 96   | 20  | 21  | 25  | 137  | 4188  | 300  | 251276  | 8402   |
| kępiński | Baranów           | 569  | 608 | 1003 | 206 | 103 | 102 | 470  | 27631 | 1980 | 1657851 | 55436  |
| kępiński | Bralin            | 178  | 107 | 214  | 43  | 110 | 78  | 637  | 14557 | 1043 | 873403  | 29205  |
| kępiński | Kępno             | 597  | 395 | 865  | 165 | 194 | 197 | 1057 | 34219 | 2452 | 2053128 | 68654  |
| kępiński | Łęka Opatowska    | 466  | 406 | 722  | 145 | 111 | 106 | 579  | 23764 | 1703 | 1425835 | 47678  |
| kępiński | Perzów            | 298  | 292 | 404  | 46  | 147 | 124 | 877  | 21925 | 1571 | 1315485 | 43988  |
| kępiński | Rychtal           | 77   | 50  | 161  | 17  | 24  | 36  | 190  | 5767  | 413  | 346039  | 11571  |
| kępiński | Trzcinica         | 291  | 176 | 284  | 66  | 75  | 99  | 525  | 14844 | 1064 | 890613  | 29781  |
| kolski   | Babiak            | 1076 | 517 | 777  | 131 | 555 | 575 | 3533 | 75175 | 5387 | 4510502 | 150825 |
| kolski   | Chodów            | 818  | 258 | 415  | 135 | 448 | 376 | 3727 | 69514 | 4981 | 4170827 | 139467 |
| kolski   | Dąbie             | 829  | 538 | 796  | 118 | 546 | 405 | 2949 | 64407 | 4615 | 3864418 | 129221 |
| kolski   | Grzegorzew        | 637  | 386 | 437  | 71  | 327 | 284 | 1902 | 41106 | 2945 | 2466342 | 82471  |
| kolski   | Kłodawa           | 1166 | 689 | 989  | 151 | 583 | 535 | 4109 | 86778 | 6218 | 5206679 | 174105 |
| kolski   | Koło              | 924  | 565 | 832  | 112 | 399 | 409 | 2722 | 61202 | 4385 | 3672118 | 122791 |
| kolski   | Kościelec         | 556  | 402 | 553  | 106 | 344 | 296 | 2129 | 46460 | 3329 | 2787612 | 93214  |
| kolski   | Olszówka          | 479  | 226 | 327  | 63  | 225 | 214 | 1559 | 32558 | 2333 | 1953455 | 65321  |
| kolski   | Osiek Mały        | 311  | 287 | 404  | 84  | 102 | 70  | 492  | 16401 | 1175 | 984051  | 32905  |
| kolski   | Przedecz          | 867  | 496 | 793  | 156 | 426 | 423 | 2484 | 58105 | 4163 | 3486308 | 116578 |
| Konin    | Konin             | 91   | 29  | 63   | 13  | 62  | 44  | 248  | 5591  | 401  | 335448  | 11217  |
| koniński | Golina            | 472  | 256 | 489  | 70  | 346 | 262 | 1652 | 37042 | 2654 | 2222539 | 74319  |
| koniński | Grodziec          | 662  | 591 | 1093 | 265 | 247 | 282 | 1420 | 46146 | 3307 | 2768736 | 92583  |
| koniński | Kazimierz Biskupi | 118  | 164 | 198  | 19  | 52  | 38  | 236  | 7600  | 545  | 456004  | 15248  |
| koniński | Kleczew           | 367  | 343 | 514  | 69  | 104 | 111 | 663  | 20623 | 1478 | 1237377 | 41376  |
| koniński | Konin             | 0    | 0   | 0    | 0   | 0   | 0   | 0    | 0     | 0    | 0       | 0      |

|              |                     |      |      |      |     |      |      |       |        |       |          |        |
|--------------|---------------------|------|------|------|-----|------|------|-------|--------|-------|----------|--------|
| koniński     | Kramsk              | 1165 | 551  | 785  | 110 | 790  | 682  | 4704  | 94074  | 6741  | 5644448  | 188743 |
| koniński     | Krzymów             | 432  | 294  | 514  | 96  | 225  | 198  | 1106  | 28904  | 2071  | 1734250  | 57991  |
| koniński     | Rychwał             | 886  | 882  | 1432 | 239 | 451  | 379  | 1913  | 60203  | 4314  | 3612160  | 120786 |
| koniński     | Rzgów               | 667  | 506  | 812  | 105 | 270  | 240  | 1163  | 35366  | 2534  | 2121969  | 70956  |
| koniński     | Skulsk              | 353  | 209  | 338  | 48  | 127  | 108  | 736   | 18701  | 1340  | 1122074  | 37521  |
| koniński     | Sompolno            | 701  | 394  | 750  | 109 | 280  | 300  | 1733  | 43174  | 3094  | 2590443  | 86621  |
| koniński     | Stare Miasto        | 694  | 783  | 1036 | 231 | 319  | 200  | 1328  | 43771  | 3136  | 2626272  | 87819  |
| koniński     | Ślesin              | 684  | 263  | 479  | 78  | 340  | 335  | 2443  | 49636  | 3557  | 2978161  | 99586  |
| koniński     | Wierzbinek          | 846  | 564  | 885  | 204 | 422  | 325  | 2476  | 59108  | 4235  | 3546479  | 118590 |
| koniński     | Wilczyn             | 476  | 374  | 734  | 96  | 212  | 184  | 1119  | 31815  | 2280  | 1908914  | 63832  |
| kościański   | Czempiń             | 1422 | 827  | 1476 | 277 | 663  | 547  | 3300  | 84933  | 6086  | 5095988  | 170403 |
| kościański   | Kościan             | 2283 | 1461 | 2201 | 357 | 743  | 803  | 5382  | 132224 | 9474  | 7933436  | 265284 |
| kościański   | Krzywiń             | 2813 | 1856 | 3466 | 499 | 993  | 950  | 4602  | 143917 | 10312 | 8634994  | 288743 |
| kościański   | Śmigiel             | 3411 | 2038 | 3360 | 574 | 1708 | 1714 | 7533  | 199735 | 14312 | 11984091 | 400733 |
| krotoszyński | Kobylin             | 1982 | 1356 | 1997 | 211 | 1158 | 987  | 5009  | 124458 | 8918  | 7467482  | 249703 |
| krotoszyński | Koźmin Wielkopolski | 2803 | 1753 | 2822 | 307 | 931  | 1206 | 5213  | 143643 | 10293 | 8618595  | 288195 |
| krotoszyński | Krotoszyn           | 4554 | 2200 | 3945 | 578 | 2025 | 1841 | 10297 | 251755 | 18039 | 15105271 | 505101 |
| krotoszyński | Rozdrażew           | 2508 | 1520 | 2597 | 395 | 940  | 966  | 5106  | 136992 | 9816  | 8219517  | 274850 |
| krotoszyński | Sulmierzyce         | 204  | 169  | 242  | 27  | 98   | 104  | 528   | 13570  | 972   | 814214   | 27226  |
| krotoszyński | Zduny               | 1269 | 428  | 667  | 114 | 599  | 636  | 3401  | 72619  | 5203  | 4357148  | 145697 |
| leszczyński  | Krzemieniewo        | 1588 | 886  | 1579 | 190 | 609  | 543  | 2873  | 78624  | 5634  | 4717451  | 157745 |
| leszczyński  | Lipno               | 566  | 452  | 806  | 59  | 173  | 135  | 973   | 29620  | 2122  | 1777211  | 59428  |
| leszczyński  | Osieczna            | 1547 | 897  | 1635 | 243 | 321  | 380  | 1897  | 63298  | 4536  | 3797884  | 126996 |
| leszczyński  | Rydzyňa             | 1115 | 769  | 1394 | 233 | 405  | 441  | 2380  | 66814  | 4788  | 4008846  | 134051 |
| leszczyński  | Święciechowa        | 985  | 542  | 781  | 125 | 530  | 493  | 2058  | 52976  | 3796  | 3178576  | 106287 |
| leszczyński  | Wijewo              | 716  | 633  | 757  | 119 | 434  | 293  | 1593  | 43091  | 3088  | 2585446  | 86454  |
| leszczyński  | Włoszakowice        | 737  | 729  | 1000 | 160 | 174  | 215  | 764   | 33331  | 2388  | 1999832  | 66872  |
| Leszno       | Leszno              | 26   | 26   | 13   | 14  | 4    | 0    | 253   | 4212   | 302   | 252728   | 8451   |

|               |                     |      |      |      |     |     |     |      |       |      |         |        |
|---------------|---------------------|------|------|------|-----|-----|-----|------|-------|------|---------|--------|
| międzychodzki | Chrzypsko Wielkie   | 422  | 478  | 833  | 102 | 231 | 151 | 728  | 27530 | 1973 | 1651829 | 55235  |
| międzychodzki | Kwilcz              | 202  | 308  | 420  | 59  | 92  | 44  | 381  | 14023 | 1005 | 841374  | 28134  |
| międzychodzki | Międzychód          | 492  | 543  | 873  | 346 | 234 | 182 | 1002 | 37542 | 2690 | 2252518 | 75321  |
| międzychodzki | Sieraków            | 359  | 387  | 500  | 64  | 194 | 161 | 694  | 21930 | 1571 | 1315784 | 43998  |
| nowotomyski   | Kuślin              | 399  | 248  | 537  | 61  | 120 | 111 | 745  | 21624 | 1549 | 1297421 | 43384  |
| nowotomyski   | Lwówek              | 778  | 531  | 1039 | 98  | 319 | 248 | 1362 | 41289 | 2959 | 2477317 | 82838  |
| nowotomyski   | Miedzichowo         | 173  | 124  | 212  | 19  | 51  | 30  | 232  | 7554  | 541  | 453228  | 15155  |
| nowotomyski   | Nowy Tomyśl         | 481  | 295  | 627  | 91  | 206 | 200 | 1052 | 29373 | 2105 | 1762393 | 58932  |
| nowotomyski   | Opalenica           | 849  | 714  | 1041 | 108 | 329 | 268 | 1759 | 48366 | 3466 | 2901933 | 97037  |
| nowotomyski   | Zbąszyń             | 432  | 308  | 543  | 90  | 166 | 148 | 656  | 21948 | 1573 | 1316851 | 44034  |
| obornicki     | Oborniki            | 1174 | 895  | 1437 | 124 | 500 | 445 | 1967 | 60368 | 4326 | 3622067 | 121117 |
| obornicki     | Rogoźno             | 526  | 397  | 764  | 158 | 197 | 163 | 761  | 28198 | 2021 | 1691887 | 56575  |
| obornicki     | Ryczywół            | 1054 | 1153 | 2137 | 338 | 456 | 378 | 1847 | 70791 | 5072 | 4247439 | 142029 |
| ostrowski     | Nowe Skalmierzyce   | 1091 | 648  | 1246 | 218 | 358 | 381 | 2067 | 58922 | 4222 | 3535333 | 118217 |
| ostrowski     | Odolanów            | 871  | 530  | 992  | 231 | 372 | 345 | 2091 | 55307 | 3963 | 3318392 | 110963 |
| ostrowski     | Ostrów Wielkopolski | 1385 | 1132 | 1738 | 286 | 445 | 371 | 2575 | 76064 | 5450 | 4563841 | 152609 |
| ostrowski     | Przygodzice         | 999  | 558  | 933  | 233 | 443 | 428 | 2487 | 61953 | 4439 | 3717171 | 124297 |
| ostrowski     | Raszków             | 1813 | 1353 | 2446 | 455 | 574 | 628 | 3003 | 98923 | 7088 | 5935354 | 198471 |
| ostrowski     | Sieroszewice        | 1434 | 1190 | 1935 | 480 | 454 | 413 | 2379 | 80253 | 5750 | 4815160 | 161013 |
| ostrowski     | Sośnie              | 369  | 260  | 351  | 86  | 185 | 170 | 981  | 24300 | 1741 | 1457991 | 48753  |
| ostrzeszowski | Czajków             | 303  | 221  | 351  | 96  | 107 | 101 | 600  | 17649 | 1265 | 1058956 | 35410  |
| ostrzeszowski | Doruchów            | 666  | 677  | 1400 | 215 | 237 | 264 | 1192 | 45528 | 3262 | 2731668 | 91343  |
| ostrzeszowski | Grabów nad Prosną   | 1396 | 1003 | 1648 | 285 | 575 | 596 | 3070 | 84656 | 6066 | 5079333 | 169846 |
| ostrzeszowski | Kobyla Góra         | 492  | 356  | 603  | 88  | 284 | 250 | 1540 | 37173 | 2664 | 2230397 | 74582  |
| ostrzeszowski | Kraszewice          | 406  | 357  | 385  | 69  | 146 | 187 | 933  | 24185 | 1733 | 1451116 | 48523  |
| ostrzeszowski | Mikstat             | 759  | 526  | 1024 | 176 | 251 | 245 | 1352 | 42143 | 3020 | 2528606 | 84553  |

|               |                       |      |      |      |     |     |     |      |        |      |         |        |
|---------------|-----------------------|------|------|------|-----|-----|-----|------|--------|------|---------|--------|
| ostrzeszowski | Ostrzeszów            | 504  | 552  | 876  | 141 | 323 | 223 | 1728 | 44736  | 3206 | 2684180 | 89756  |
| pilski        | Białośliwie           | 604  | 288  | 530  | 230 | 257 | 324 | 1678 | 41812  | 2996 | 2508748 | 83889  |
| pilski        | Kaczory               | 602  | 353  | 684  | 95  | 265 | 292 | 1627 | 40093  | 2873 | 2405573 | 80439  |
| pilski        | Łobżenica             | 1621 | 1199 | 1776 | 472 | 887 | 742 | 4687 | 117170 | 8396 | 7030225 | 235082 |
| pilski        | Miasteczko Krajeńskie | 558  | 192  | 467  | 117 | 320 | 303 | 1855 | 40884  | 2930 | 2453061 | 82027  |
| pilski        | Piła                  | 23   | 3    | 8    | 0   | 10  | 12  | 78   | 1443   | 103  | 86563   | 2895   |
| pilski        | Szydłowo              | 23   | 21   | 23   | 18  | 22  | 20  | 157  | 3316   | 238  | 198963  | 6653   |
| pilski        | Ujście                | 299  | 173  | 293  | 63  | 143 | 162 | 1039 | 23215  | 1663 | 1392909 | 46577  |
| pilski        | Wyrzysk               | 1864 | 1303 | 2153 | 387 | 932 | 850 | 4846 | 124418 | 8915 | 7465090 | 249623 |
| pilski        | Wysoka                | 1090 | 495  | 855  | 258 | 629 | 600 | 3387 | 77053  | 5521 | 4623158 | 154592 |
| pleszewski    | Chocz                 | 205  | 138  | 209  | 75  | 76  | 93  | 330  | 10983  | 787  | 658981  | 22035  |
| pleszewski    | Czermin               | 482  | 510  | 650  | 154 | 208 | 181 | 822  | 28329  | 2030 | 1699744 | 56837  |
| pleszewski    | Dobrzyca              | 1169 | 795  | 1292 | 137 | 388 | 402 | 1867 | 56146  | 4023 | 3368784 | 112648 |
| pleszewski    | Gizałki               | 504  | 325  | 578  | 123 | 211 | 150 | 875  | 26563  | 1903 | 1593751 | 53293  |
| pleszewski    | Gołuchów              | 759  | 613  | 1032 | 382 | 284 | 308 | 1661 | 51968  | 3724 | 3118106 | 104265 |
| pleszewski    | Pleszew               | 704  | 546  | 919  | 229 | 288 | 237 | 1106 | 38537  | 2761 | 2312220 | 77318  |
| Poznań        | Poznań                | 105  | 43   | 96   | 530 | 54  | 53  | 342  | 17766  | 1273 | 1065960 | 35644  |
| poznański     | Buk                   | 459  | 640  | 1076 | 155 | 202 | 137 | 1079 | 36838  | 2640 | 2210283 | 73909  |
| poznański     | Czerwonak             | 35   | 21   | 20   | 2   | 13  | 10  | 51   | 1327   | 95   | 79645   | 2663   |
| poznański     | Dopiewo               | 76   | 65   | 133  | 34  | 27  | 17  | 162  | 5247   | 376  | 314821  | 10527  |
| poznański     | Kleszczewo            | 424  | 467  | 904  | 177 | 120 | 139 | 772  | 29807  | 2136 | 1788400 | 59802  |
| poznański     | Komorniki             | 77   | 118  | 120  | 19  | 8   | 2   | 28   | 2869   | 206  | 172144  | 5756   |
| poznański     | Kostrzyn              | 899  | 548  | 1015 | 130 | 378 | 392 | 2424 | 58993  | 4227 | 3539604 | 118360 |
| poznański     | Kórnik                | 818  | 531  | 982  | 129 | 233 | 286 | 1779 | 47344  | 3392 | 2840651 | 94988  |
| poznański     | Luboń                 | 0    | 0    | 0    | 0   | 0   | 0   | 9    | 128    | 9    | 7687    | 257    |
| poznański     | Mosina                | 507  | 591  | 1004 | 192 | 90  | 84  | 607  | 28848  | 2067 | 1730876 | 57878  |
| poznański     | Murowana Goślina      | 90   | 76   | 86   | 23  | 20  | 31  | 172  | 4841   | 347  | 290479  | 9713   |

|             |                  |      |      |      |     |     |     |      |        |      |         |        |
|-------------|------------------|------|------|------|-----|-----|-----|------|--------|------|---------|--------|
| poznański   | Pobiedziska      | 382  | 244  | 455  | 100 | 107 | 173 | 870  | 23844  | 1709 | 1430618 | 47838  |
| poznański   | Puszczykowo      | 0    | 2    | 2    | 0   | 0   | 0   | 3    | 74     | 5    | 4441    | 149    |
| poznański   | Rokietnica       | 208  | 86   | 113  | 24  | 136 | 137 | 585  | 13045  | 935  | 782697  | 26172  |
| poznański   | Stęszew          | 848  | 727  | 1175 | 151 | 401 | 397 | 1794 | 53077  | 3803 | 3184597 | 106489 |
| poznański   | Suchy Las        | 56   | 62   | 79   | 11  | 50  | 32  | 124  | 3846   | 276  | 230778  | 7717   |
| poznański   | Swarzędz         | 155  | 83   | 124  | 17  | 60  | 61  | 366  | 8597   | 616  | 515834  | 17249  |
| poznański   | Tarnowo Podgórne | 135  | 145  | 354  | 52  | 7   | 3   | 42   | 6637   | 476  | 398224  | 13316  |
| rawicki     | Bojanowo         | 1670 | 751  | 1290 | 158 | 866 | 873 | 3927 | 94153  | 6746 | 5649188 | 188902 |
| rawicki     | Jutrosin         | 2320 | 2109 | 3835 | 601 | 600 | 562 | 3070 | 122274 | 8761 | 7336463 | 245322 |
| rawicki     | Miejska Górka    | 2242 | 2187 | 3322 | 548 | 438 | 609 | 3089 | 115657 | 8287 | 6939392 | 232044 |
| rawicki     | Pakość           | 1920 | 1394 | 2248 | 455 | 576 | 624 | 3066 | 97931  | 7017 | 5875866 | 196481 |
| rawicki     | Rawicz           | 1647 | 1238 | 2209 | 293 | 559 | 466 | 2396 | 81600  | 5847 | 4896000 | 163716 |
| śłupecki    | Lądek            | 715  | 752  | 1446 | 180 | 264 | 198 | 808  | 39677  | 2843 | 2380590 | 79604  |
| śłupecki    | Orchowo          | 306  | 202  | 460  | 97  | 86  | 66  | 434  | 15984  | 1145 | 959069  | 32070  |
| śłupecki    | Ostrowite        | 383  | 330  | 435  | 67  | 150 | 89  | 605  | 18782  | 1346 | 1126942 | 37683  |
| śłupecki    | Powidz           | 45   | 43   | 94   | 6   | 22  | 13  | 72   | 2737   | 196  | 164201  | 5491   |
| śłupecki    | Słupca           | 906  | 712  | 1193 | 164 | 305 | 306 | 1761 | 51684  | 3703 | 3101066 | 103696 |
| śłupecki    | Strzałkowo       | 482  | 418  | 569  | 65  | 182 | 207 | 935  | 27034  | 1937 | 1622021 | 54238  |
| śłupecki    | Zagórów          | 1176 | 870  | 1475 | 197 | 591 | 507 | 2459 | 70251  | 5034 | 4215069 | 140946 |
| szamotulski | Duszniki         | 673  | 888  | 1216 | 155 | 334 | 204 | 1208 | 43111  | 3089 | 2586685 | 86495  |
| szamotulski | Kaźmierz         | 237  | 231  | 390  | 16  | 125 | 116 | 671  | 17659  | 1265 | 1059554 | 35430  |
| szamotulski | Obrzycko         | 231  | 385  | 508  | 52  | 140 | 146 | 528  | 18735  | 1342 | 1124124 | 37589  |
| szamotulski | Ostroróg         | 296  | 301  | 407  | 49  | 126 | 109 | 640  | 18419  | 1320 | 1105120 | 36954  |
| szamotulski | Pniewy           | 639  | 627  | 619  | 99  | 153 | 154 | 829  | 27272  | 1954 | 1636327 | 54717  |
| szamotulski | Szamotuły        | 1059 | 736  | 1160 | 174 | 446 | 398 | 2134 | 58897  | 4220 | 3533796 | 118166 |
| szamotulski | Wronki           | 600  | 418  | 613  | 59  | 239 | 189 | 1228 | 31876  | 2284 | 1912586 | 63954  |
| średzki     | Dominowo         | 428  | 177  | 430  | 88  | 190 | 194 | 1171 | 28010  | 2007 | 1680613 | 56198  |
| średzki     | Krzykosy         | 496  | 693  | 816  | 183 | 116 | 119 | 719  | 29044  | 2081 | 1742620 | 58271  |

|             |                       |      |      |      |     |     |     |      |        |      |         |        |
|-------------|-----------------------|------|------|------|-----|-----|-----|------|--------|------|---------|--------|
| średzki     | Nowe Miasto nad Wartą | 745  | 405  | 669  | 134 | 334 | 320 | 1997 | 47107  | 3375 | 2826430 | 94512  |
| średzki     | Środa Wielkopolska    | 986  | 678  | 1001 | 194 | 435 | 526 | 2175 | 59075  | 4233 | 3544515 | 118524 |
| średzki     | Zaniemyśl             | 524  | 471  | 596  | 67  | 194 | 151 | 1501 | 35168  | 2520 | 2110054 | 70557  |
| śremski     | Brodnica              | 1265 | 531  | 853  | 99  | 488 | 603 | 2954 | 67657  | 4848 | 4059409 | 135741 |
| śremski     | Dolsk                 | 2438 | 755  | 1087 | 136 | 301 | 281 | 1546 | 50012  | 3584 | 3000710 | 100340 |
| śremski     | Książ Wielkopolski    | 1166 | 887  | 1239 | 186 | 319 | 229 | 1650 | 51552  | 3694 | 3093123 | 103430 |
| śremski     | Śrem                  | 1362 | 1054 | 1787 | 262 | 422 | 466 | 2268 | 72375  | 5186 | 4342501 | 145208 |
| turecki     | Brudzew               | 433  | 292  | 425  | 69  | 250 | 217 | 1558 | 34104  | 2444 | 2046210 | 68423  |
| turecki     | Dobra                 | 751  | 471  | 631  | 56  | 346 | 333 | 2113 | 47265  | 3387 | 2835911 | 94829  |
| turecki     | Kawęczyn              | 1218 | 609  | 1071 | 194 | 672 | 623 | 4000 | 88169  | 6318 | 5290125 | 176895 |
| turecki     | Małanów               | 799  | 558  | 661  | 53  | 463 | 332 | 2385 | 52381  | 3753 | 3142874 | 105094 |
| turecki     | Przykona              | 474  | 335  | 489  | 36  | 249 | 185 | 1336 | 30917  | 2215 | 1855020 | 62029  |
| turecki     | Tuliszków             | 677  | 506  | 759  | 86  | 398 | 301 | 1680 | 43006  | 3082 | 2580364 | 86284  |
| turecki     | Turek                 | 641  | 381  | 851  | 137 | 363 | 309 | 1835 | 46608  | 3340 | 2796452 | 93510  |
| turecki     | Władysławów           | 358  | 285  | 455  | 46  | 208 | 154 | 790  | 21967  | 1574 | 1318047 | 44074  |
| wągrowiecki | Damaśławek            | 953  | 835  | 1287 | 389 | 319 | 271 | 1393 | 52287  | 3747 | 3137237 | 104905 |
| wągrowiecki | Gołańcz               | 1020 | 1084 | 1761 | 284 | 427 | 205 | 1220 | 54046  | 3873 | 3242761 | 108434 |
| wągrowiecki | Mieścisko             | 619  | 404  | 954  | 124 | 212 | 182 | 1146 | 35674  | 2556 | 2140417 | 71573  |
| wągrowiecki | Skoki                 | 353  | 282  | 486  | 47  | 84  | 124 | 476  | 16976  | 1216 | 1018557 | 34059  |
| wągrowiecki | Wapno                 | 346  | 171  | 314  | 33  | 114 | 151 | 758  | 18699  | 1340 | 1121946 | 37516  |
| wągrowiecki | Wągrowiec             | 1884 | 1324 | 2361 | 401 | 690 | 794 | 3859 | 111477 | 7988 | 6688628 | 223659 |
| wolsztyński | Przemęt               | 2160 | 1778 | 3108 | 629 | 744 | 667 | 3874 | 126054 | 9032 | 7563226 | 252905 |
| wolsztyński | Siedlec               | 1360 | 858  | 1745 | 403 | 437 | 429 | 2174 | 72170  | 5171 | 4330202 | 144796 |
| wolsztyński | Wolsztyn              | 1257 | 1022 | 1895 | 238 | 453 | 333 | 1901 | 66159  | 4741 | 3969558 | 132737 |
| wrzesiński  | Kołaczkowo            | 867  | 714  | 1084 | 214 | 413 | 387 | 2170 | 58571  | 4197 | 3514237 | 117512 |
| wrzesiński  | Miłosław              | 724  | 322  | 452  | 71  | 216 | 247 | 1512 | 34742  | 2489 | 2084516 | 69704  |
| wrzesiński  | Nekla                 | 310  | 272  | 318  | 57  | 163 | 130 | 922  | 21882  | 1568 | 1312923 | 43902  |

|            |           |      |     |      |     |     |     |      |       |      |         |        |
|------------|-----------|------|-----|------|-----|-----|-----|------|-------|------|---------|--------|
| wrzesiński | Pyzdry    | 781  | 606 | 958  | 232 | 325 | 274 | 1530 | 46077 | 3302 | 2764594 | 92444  |
| wrzesiński | Września  | 1383 | 580 | 1030 | 173 | 738 | 625 | 3641 | 82706 | 5926 | 4962364 | 165935 |
| złotowski  | Jastrowie | 106  | 58  | 54   | 17  | 65  | 50  | 427  | 8353  | 599  | 501186  | 16759  |
| złotowski  | Krajenka  | 457  | 473 | 675  | 221 | 154 | 170 | 920  | 30777 | 2205 | 1846607 | 61748  |
| złotowski  | Lipka     | 457  | 303 | 452  | 165 | 255 | 182 | 1544 | 35846 | 2569 | 2150752 | 71918  |
| złotowski  | Okonek    | 74   | 64  | 40   | 126 | 34  | 23  | 238  | 7193  | 515  | 431577  | 14431  |
| złotowski  | Tarnówka  | 38   | 34  | 37   | 18  | 27  | 13  | 240  | 4686  | 336  | 281170  | 9402   |
| złotowski  | Zakrzewo  | 763  | 445 | 791  | 273 | 314 | 319 | 2290 | 55550 | 3980 | 3332997 | 111451 |
| złotowski  | Złotów    | 914  | 547 | 894  | 216 | 483 | 434 | 3151 | 70633 | 5061 | 4237959 | 141712 |
